# Supplementary material
Source: ML conference proceedings conference paper supplement (https://openreview.net/forum?id=Debxx12J0U)

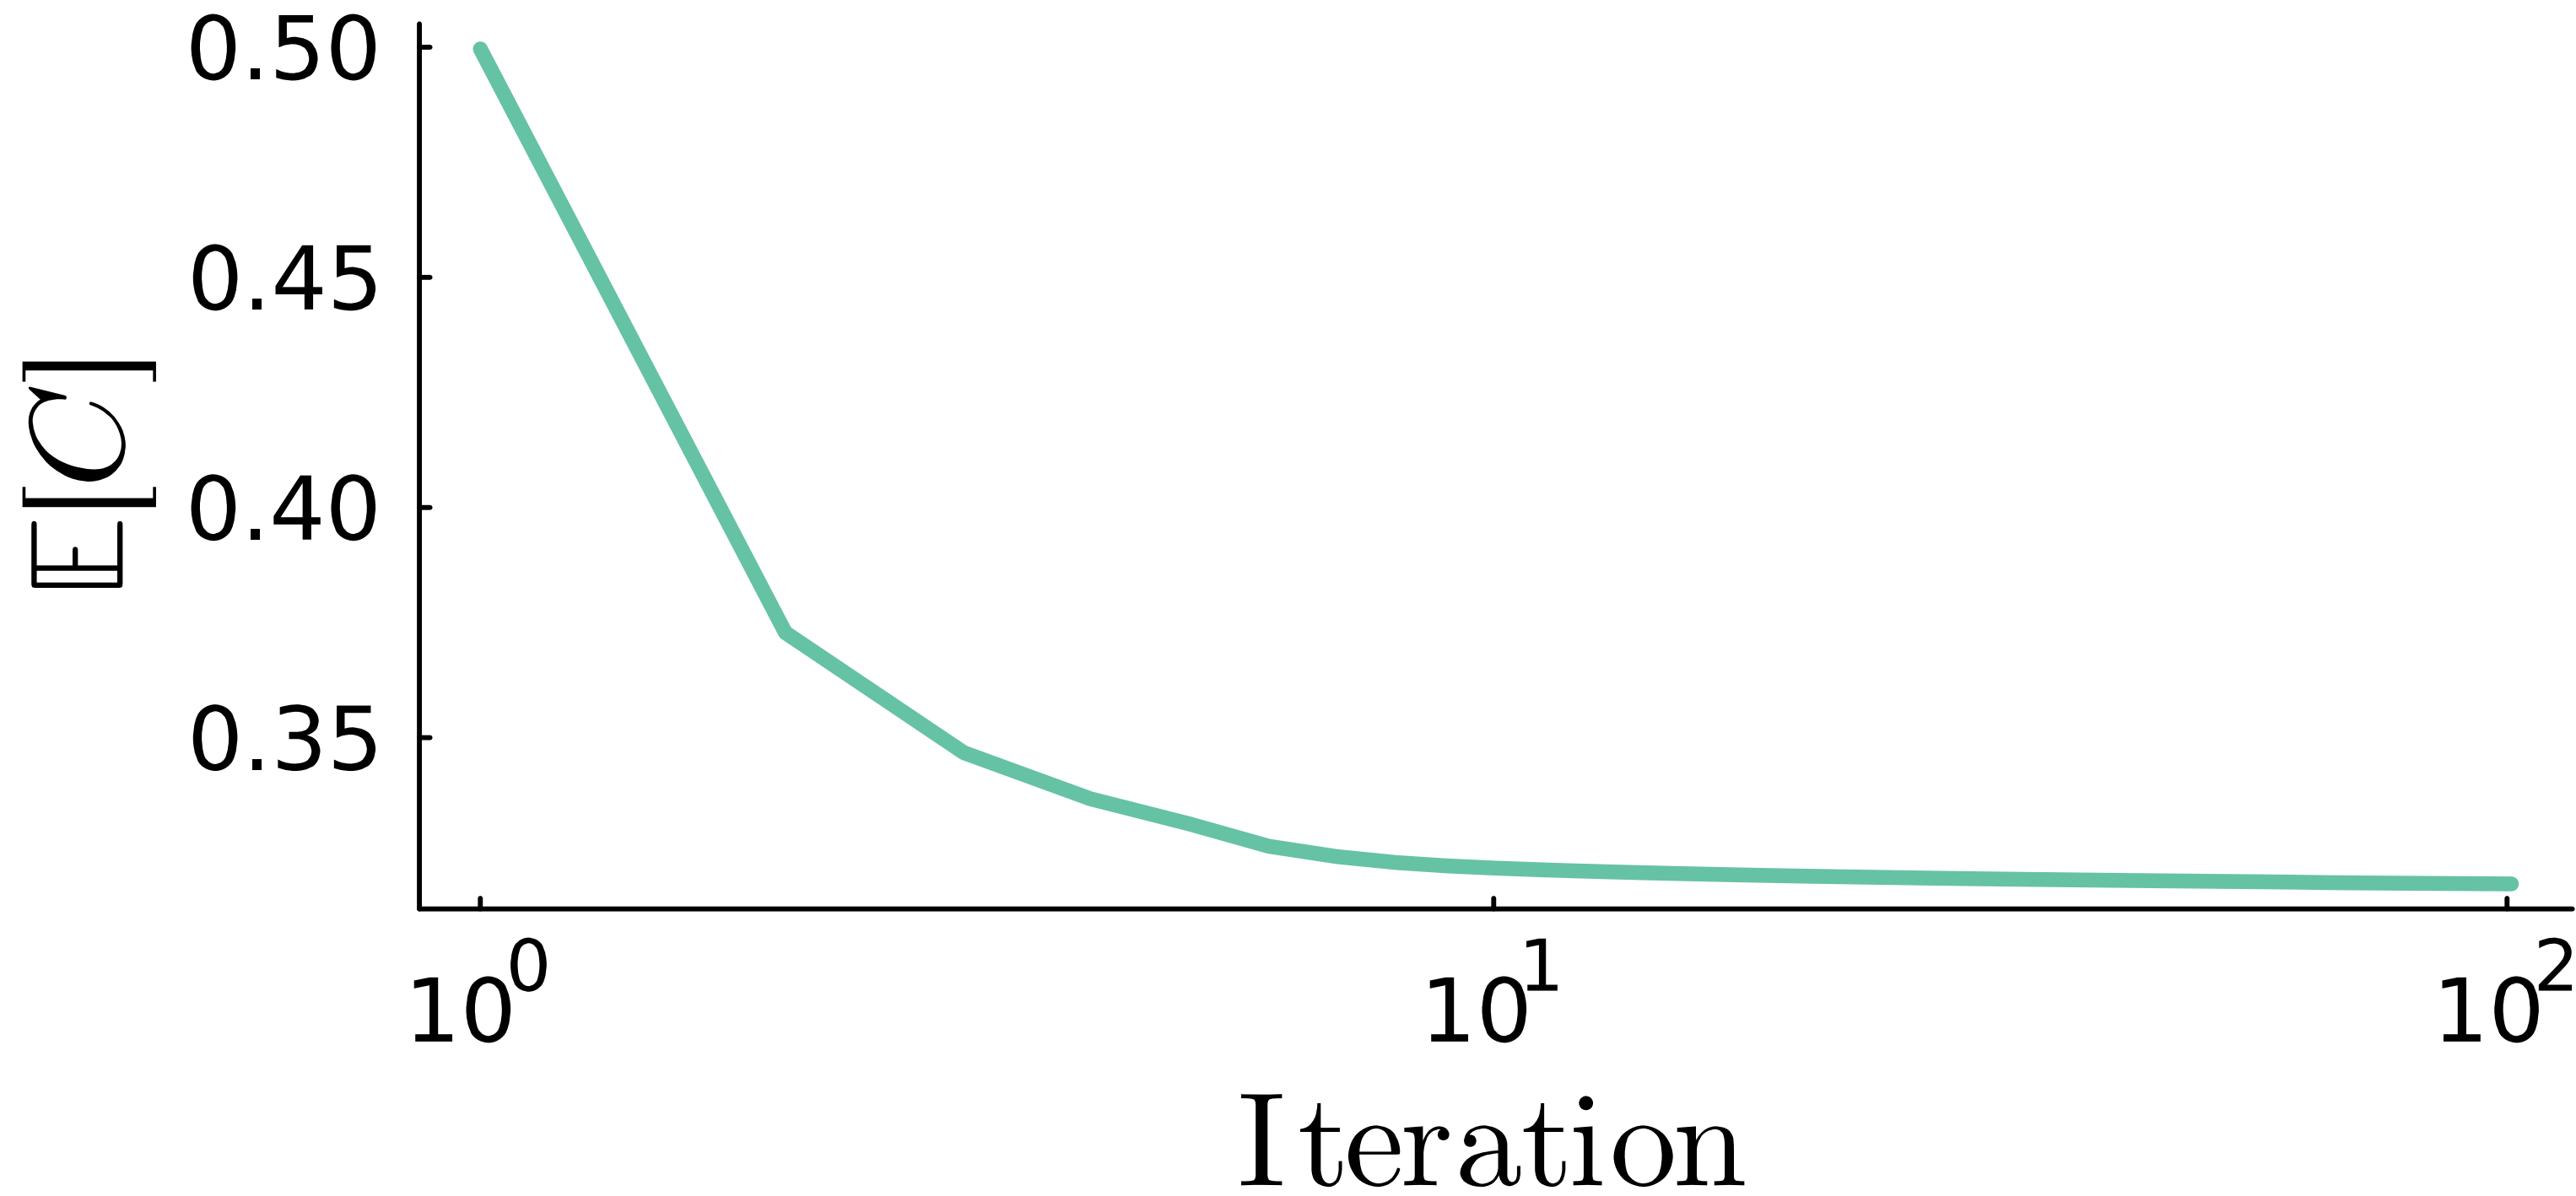

Supplement: supplementary_material [file Convergence_EC_1D_Reaching_Task.pdf › Supp_Mat_Submission/Plots/EC_1D_Reaching_Task/Convergence_EC_1D_Reaching_Task.pdf]

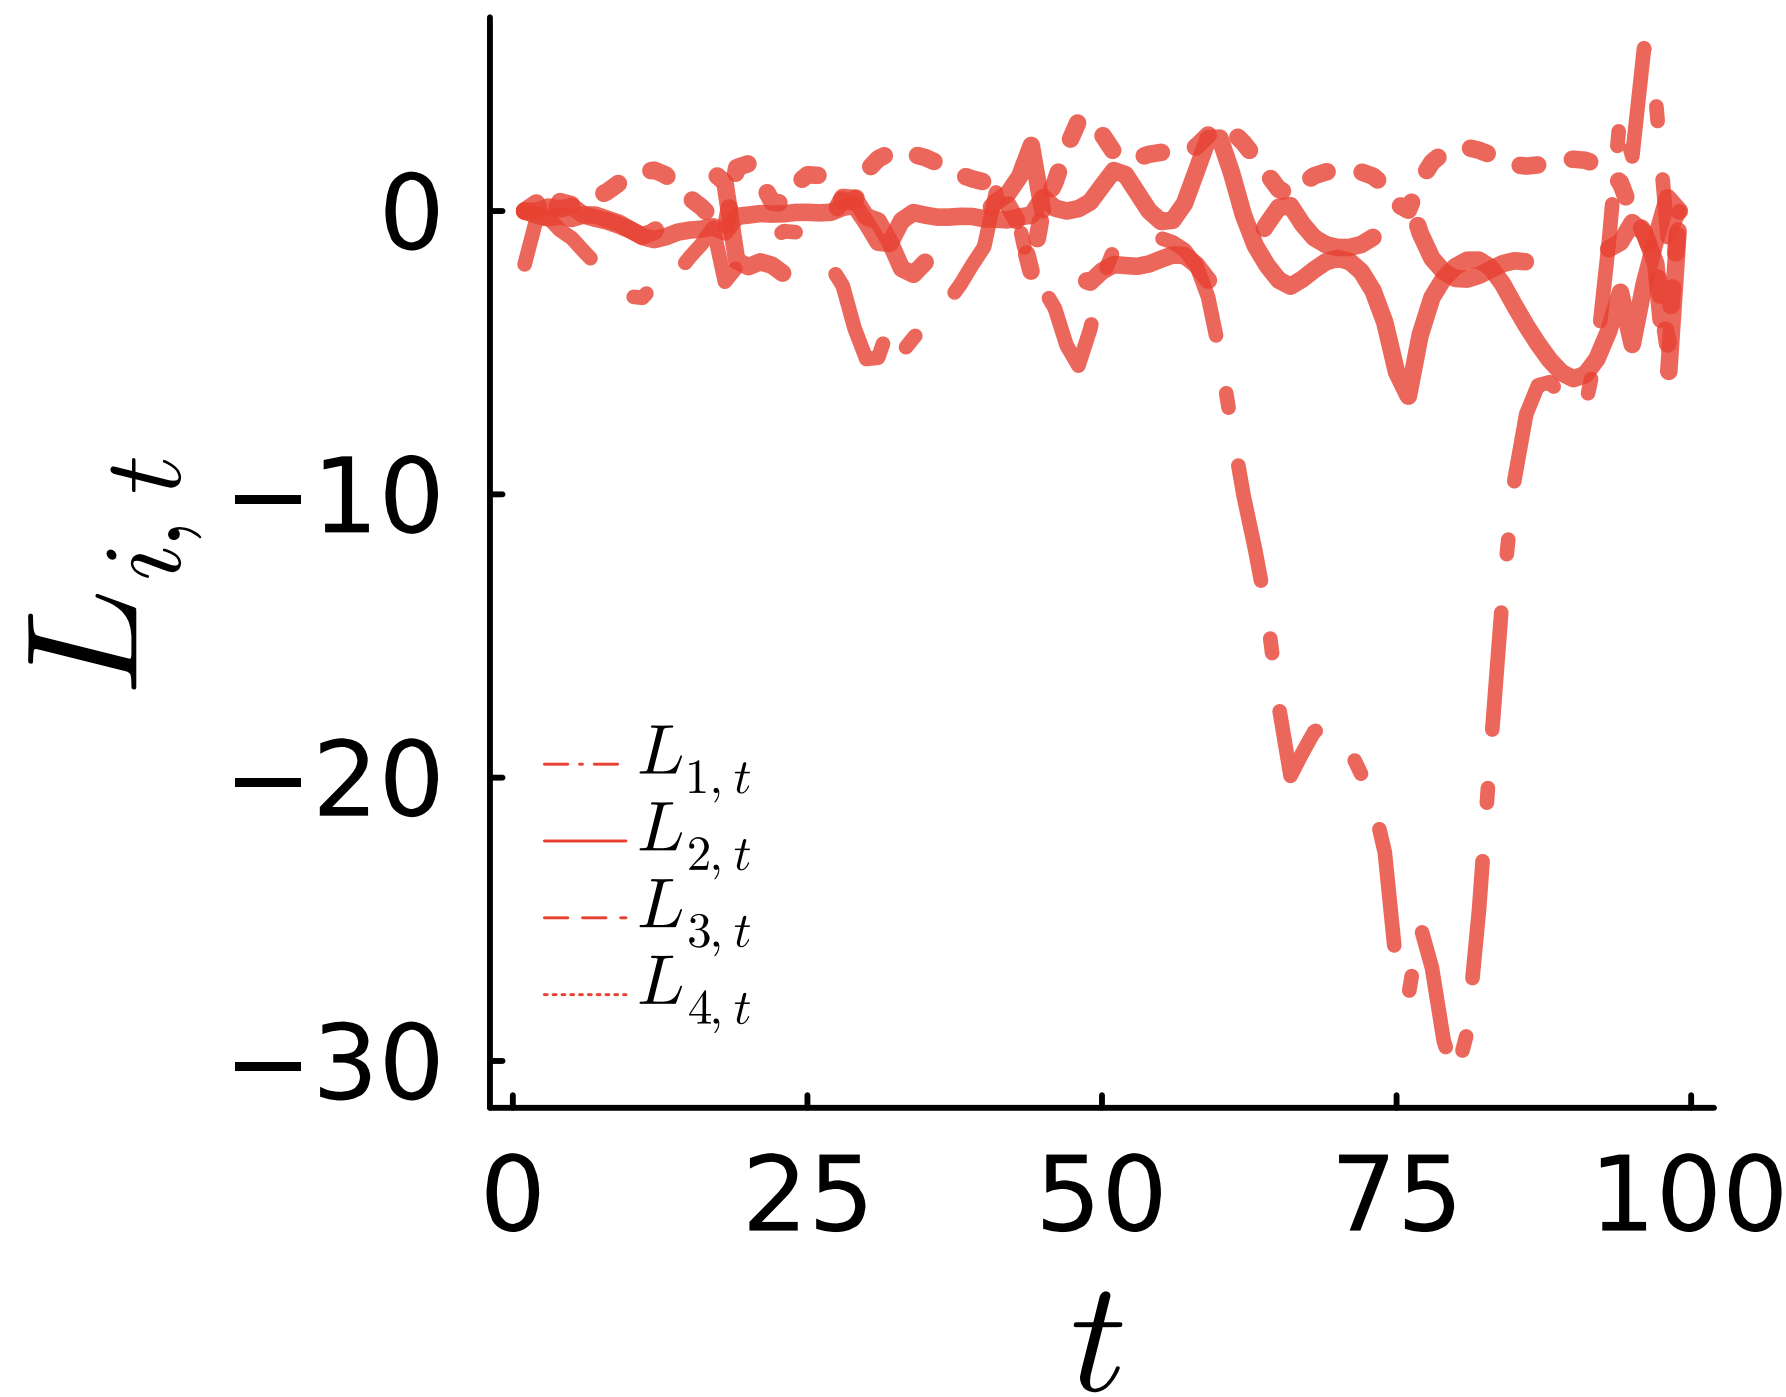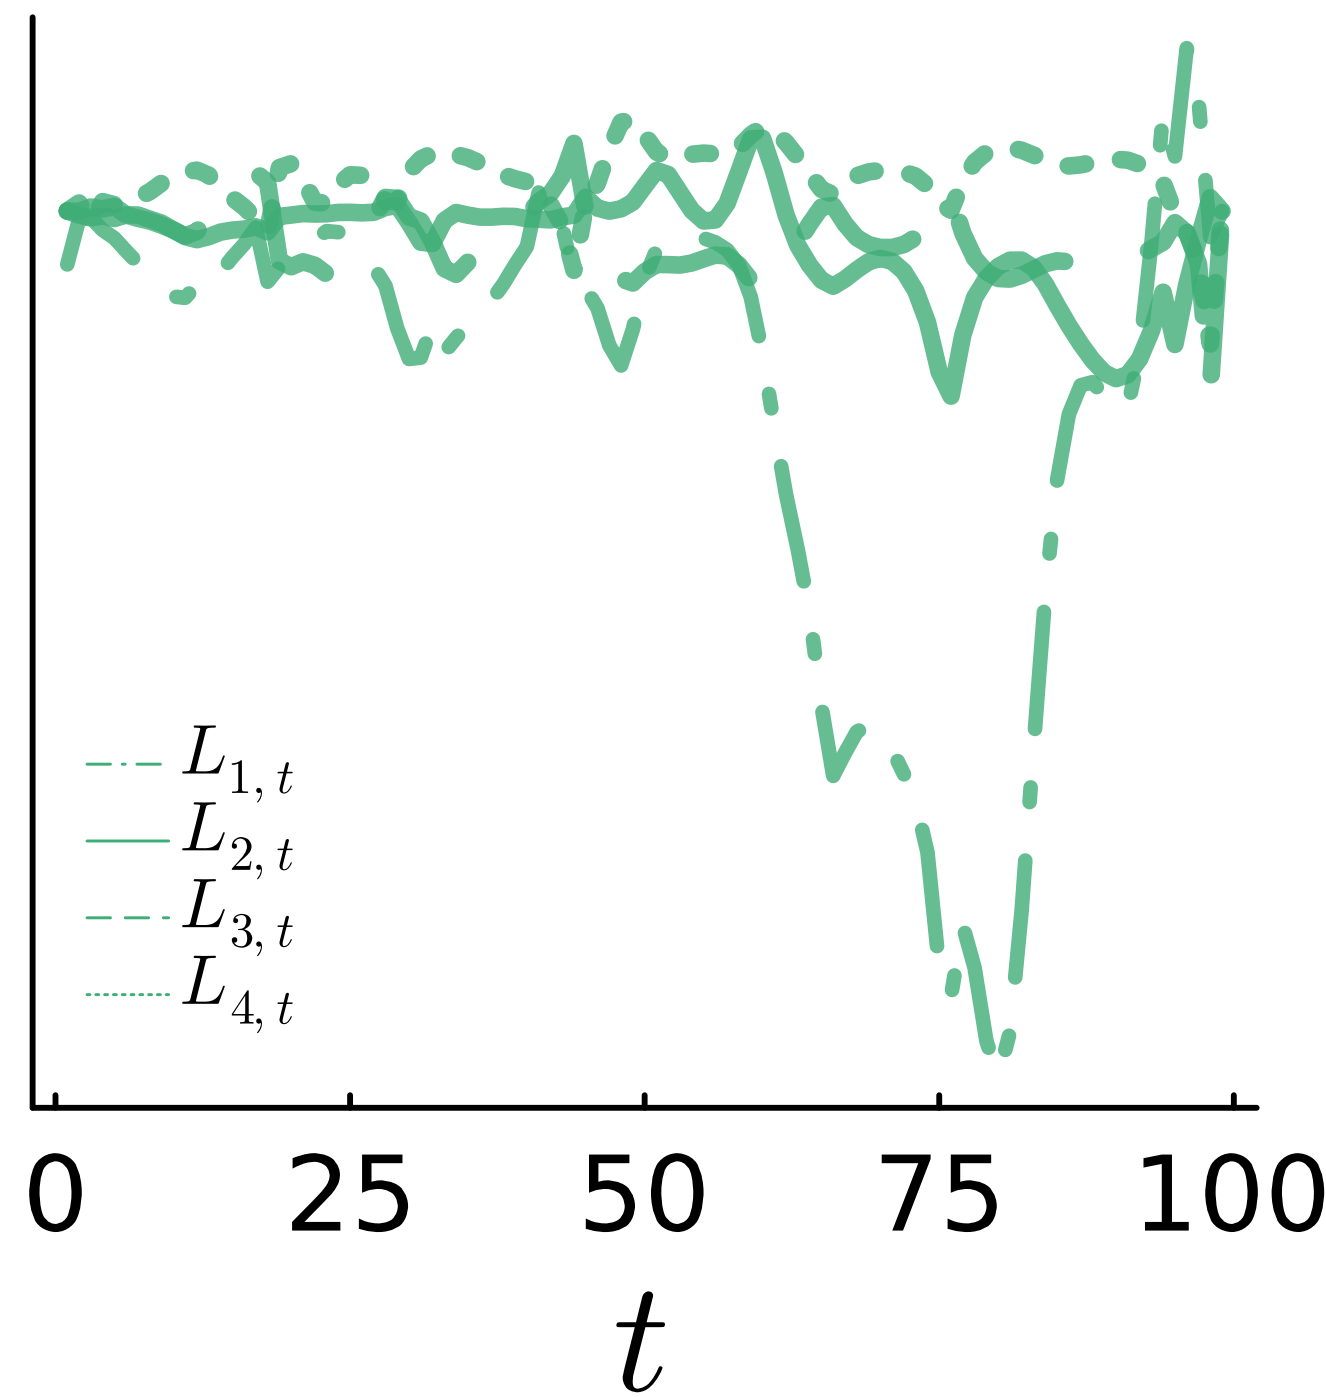

Supplement: supplementary_material [file Solution_L_EC_GD.pdf › Supp_Mat_Submission/Plots/EC_1D_Reaching_Task/Solution_L_EC_GD.pdf]

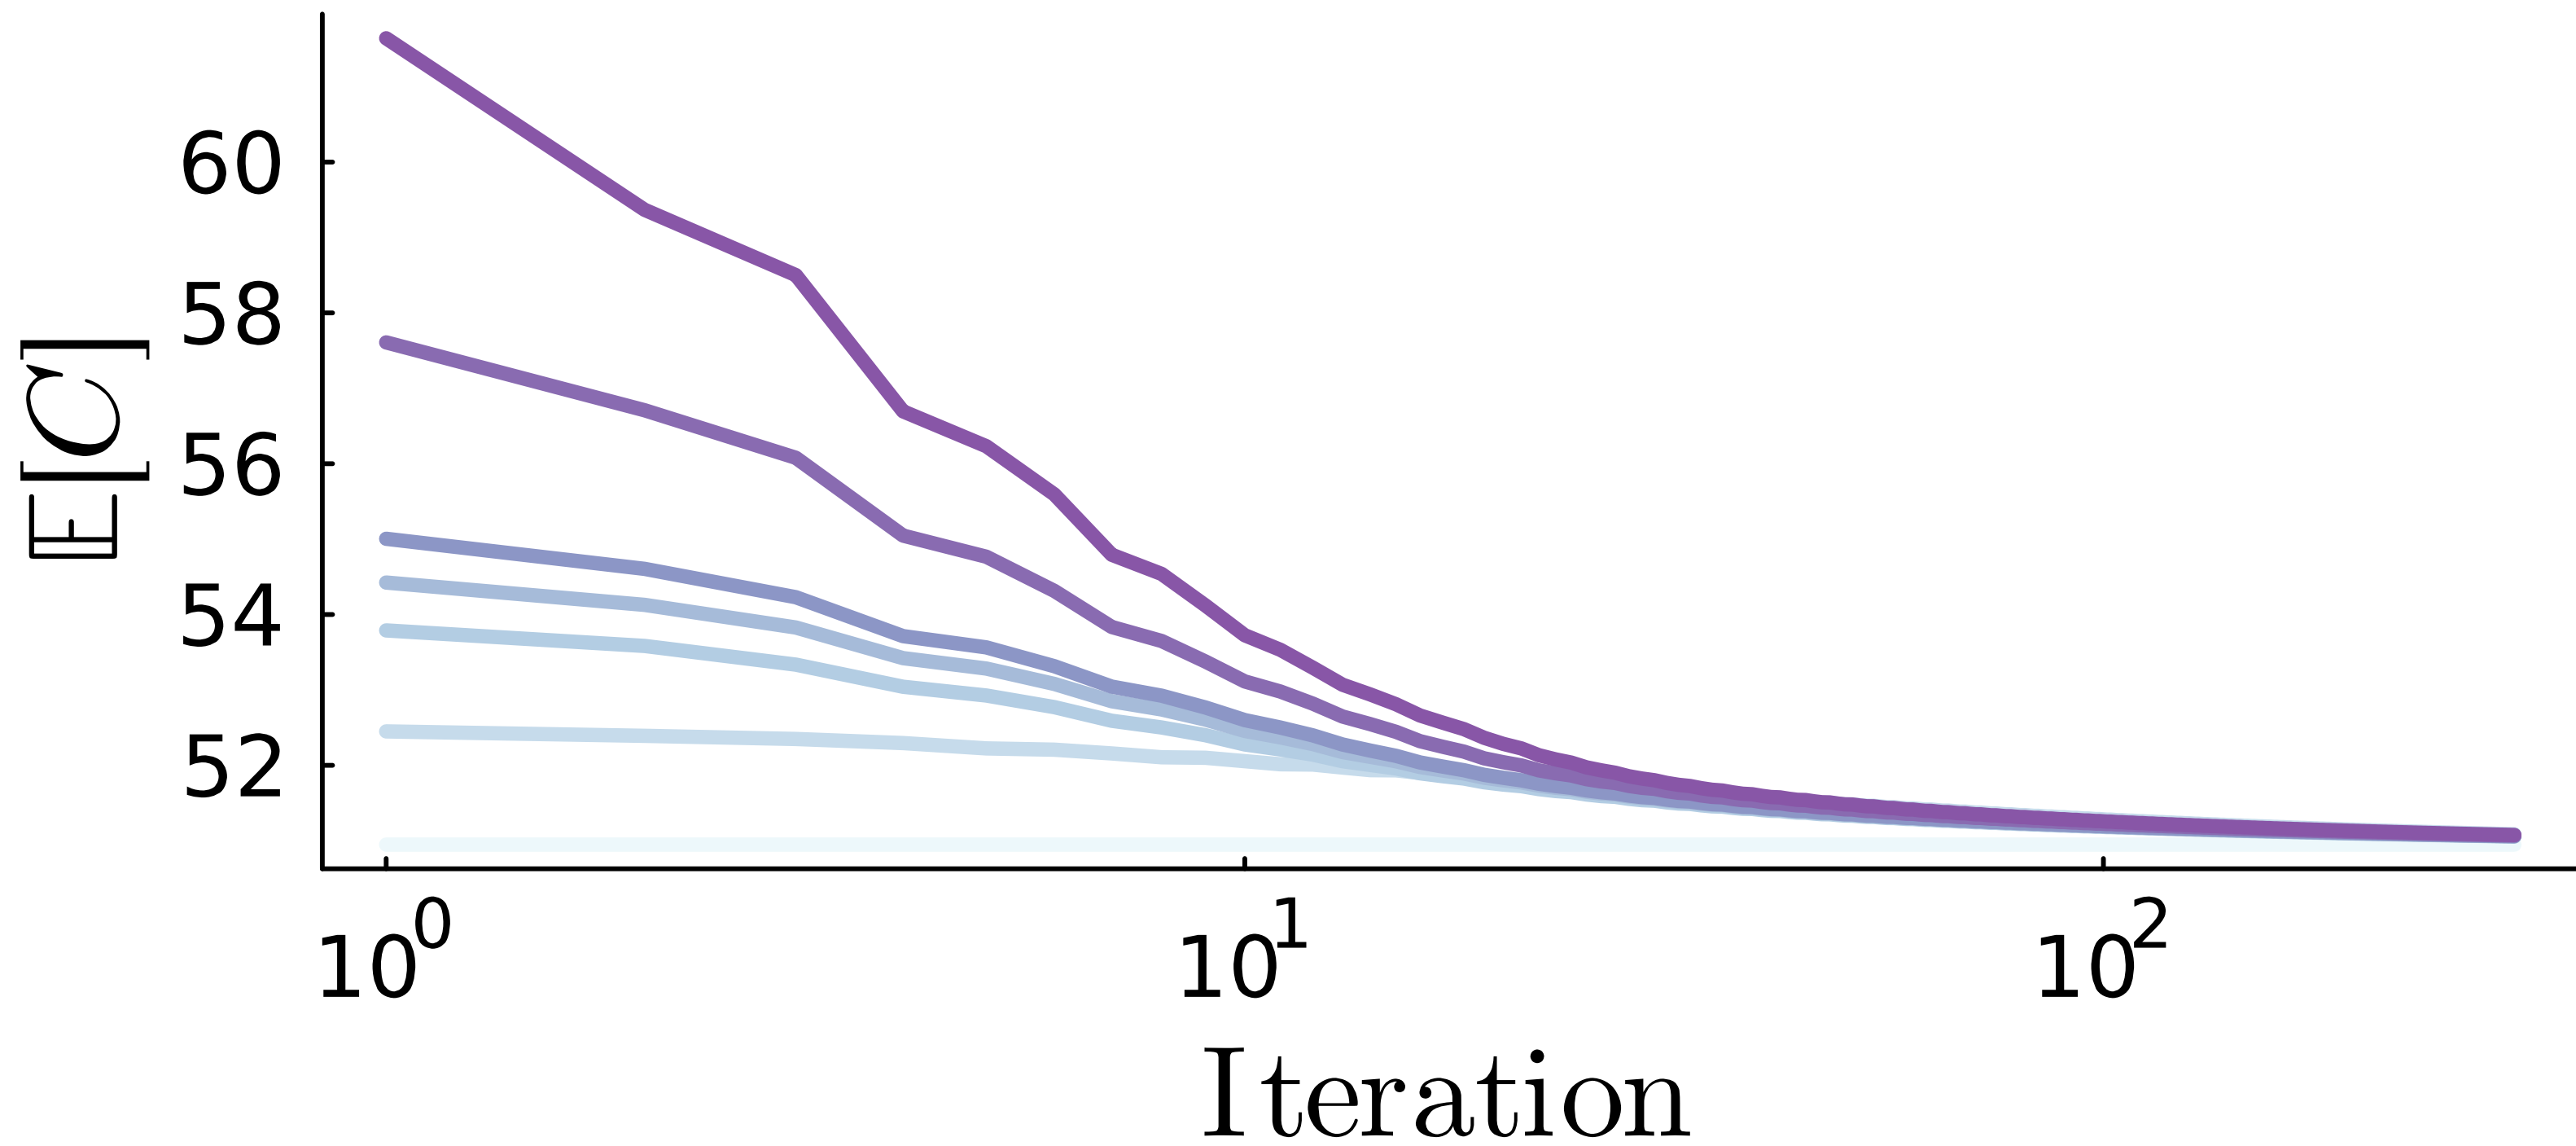

Supplement: supplementary_material [file Convergence_LSC_3D_Reaching_Task.pdf › Supp_Mat_Submission/Plots/NSC_3D_Reaching_Task/Convergence_LSC_3D_Reaching_Task.pdf]

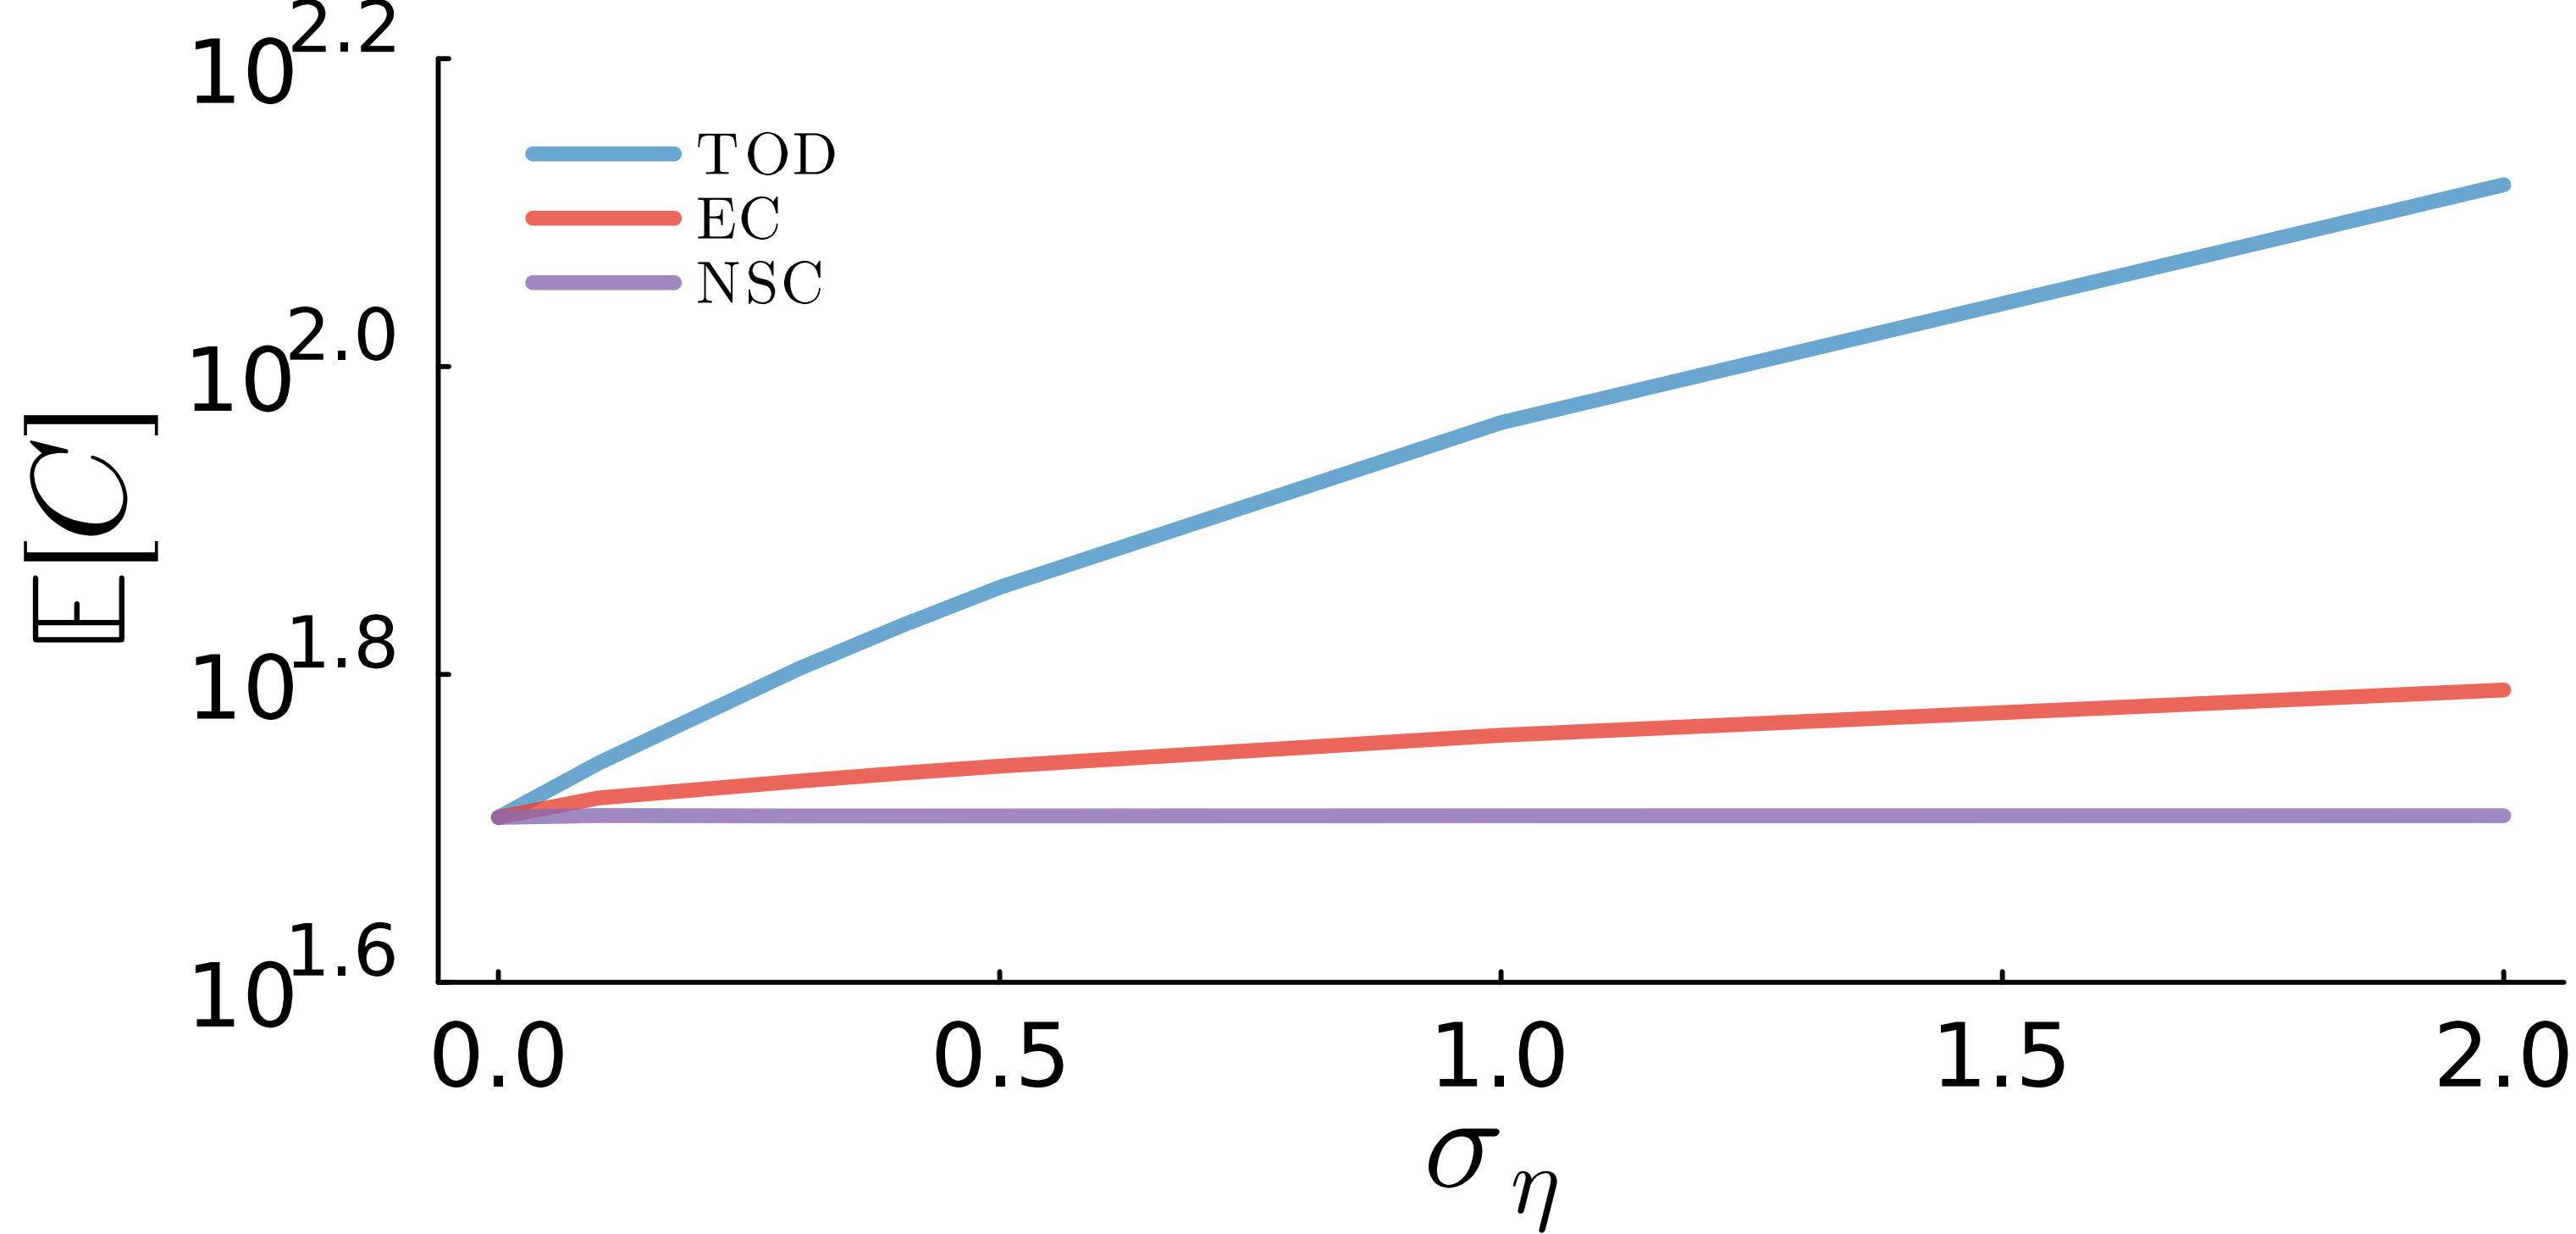

Supplement: supplementary_material [file Cost_3D_Reaching_Task.pdf › Supp_Mat_Submission/Plots/NSC_3D_Reaching_Task/Cost_3D_Reaching_Task.pdf]

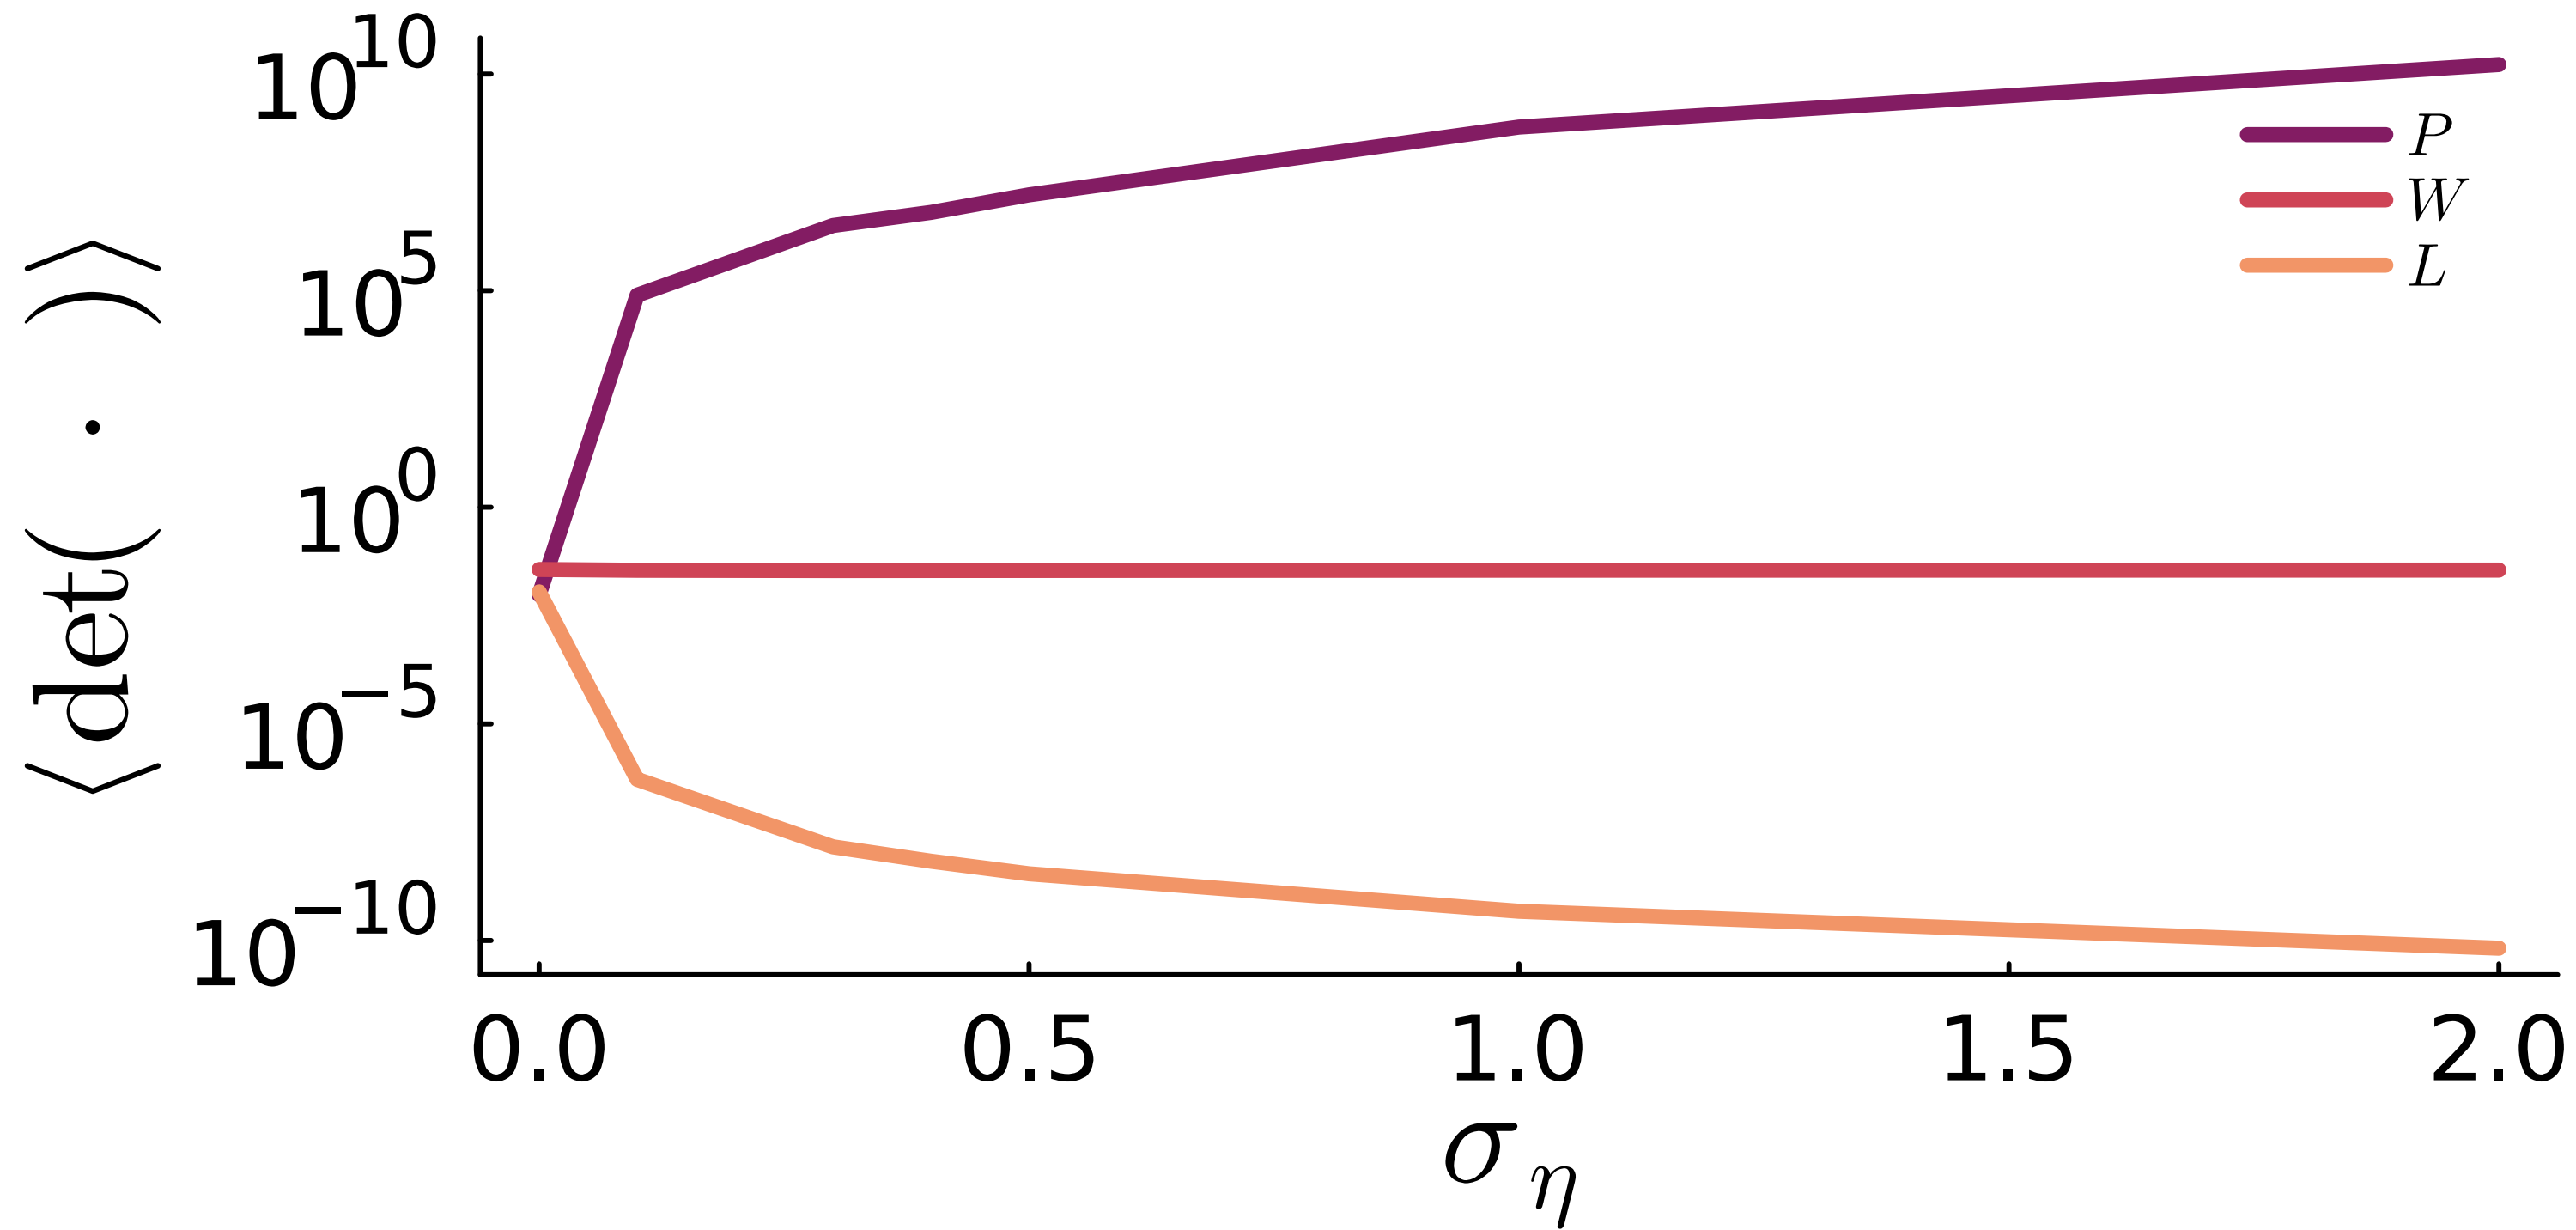

Supplement: supplementary_material [file Determinant_KML.pdf › Supp_Mat_Submission/Plots/NSC_3D_Reaching_Task/Determinant_KML.pdf]

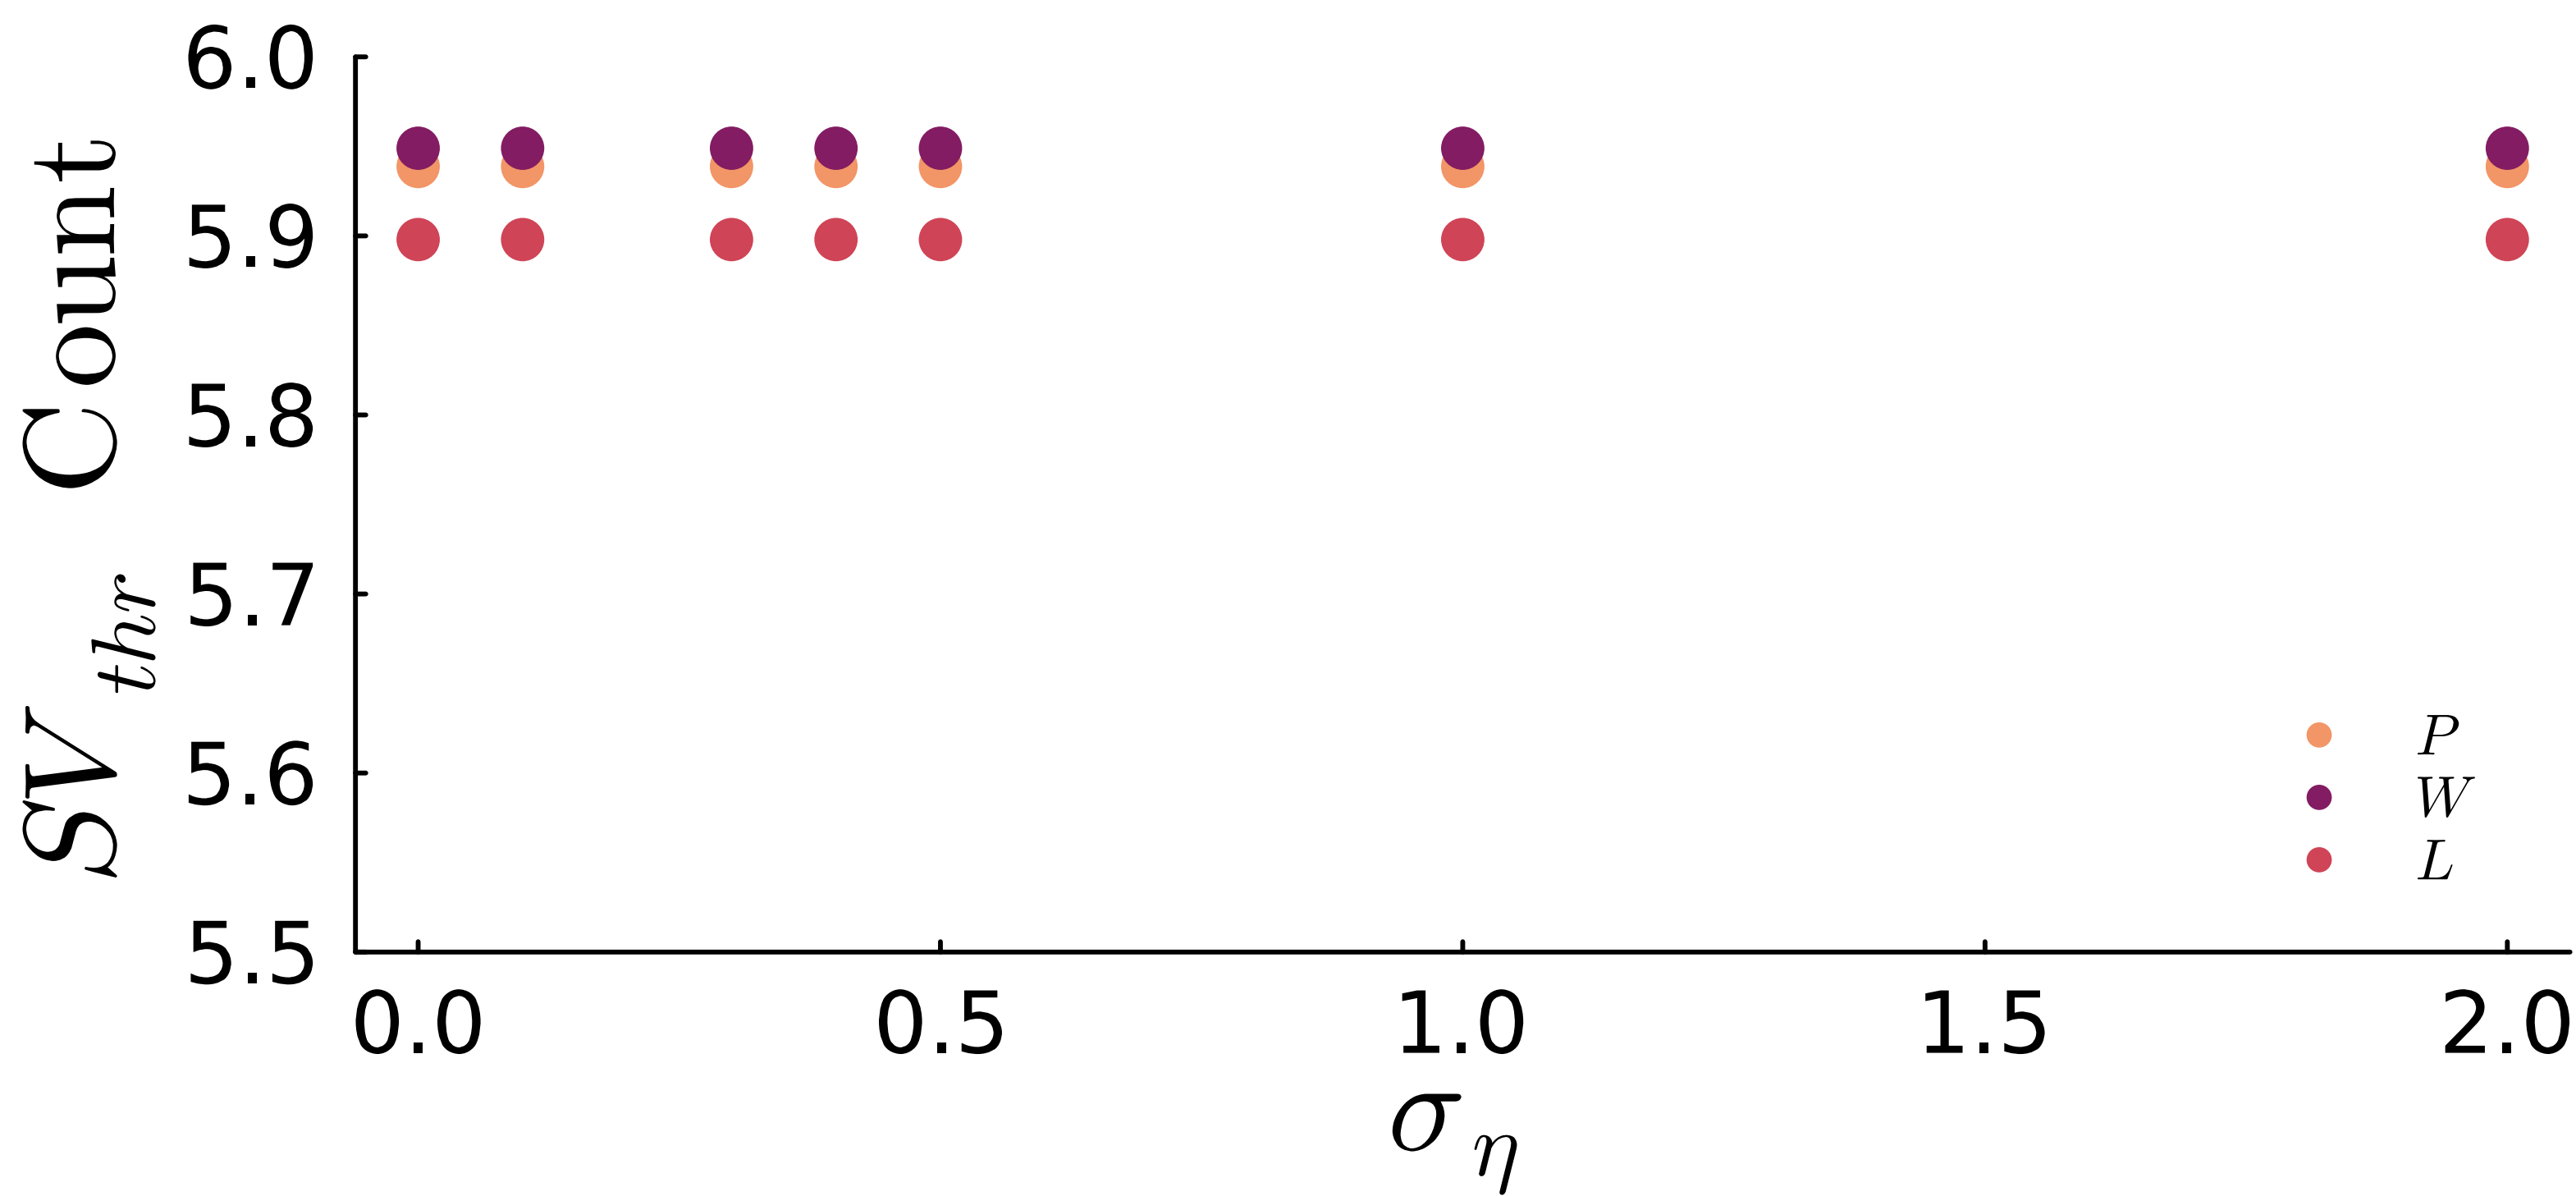

Supplement: supplementary_material [file Effective_rank.pdf › Supp_Mat_Submission/Plots/NSC_3D_Reaching_Task/Effective_rank.pdf]

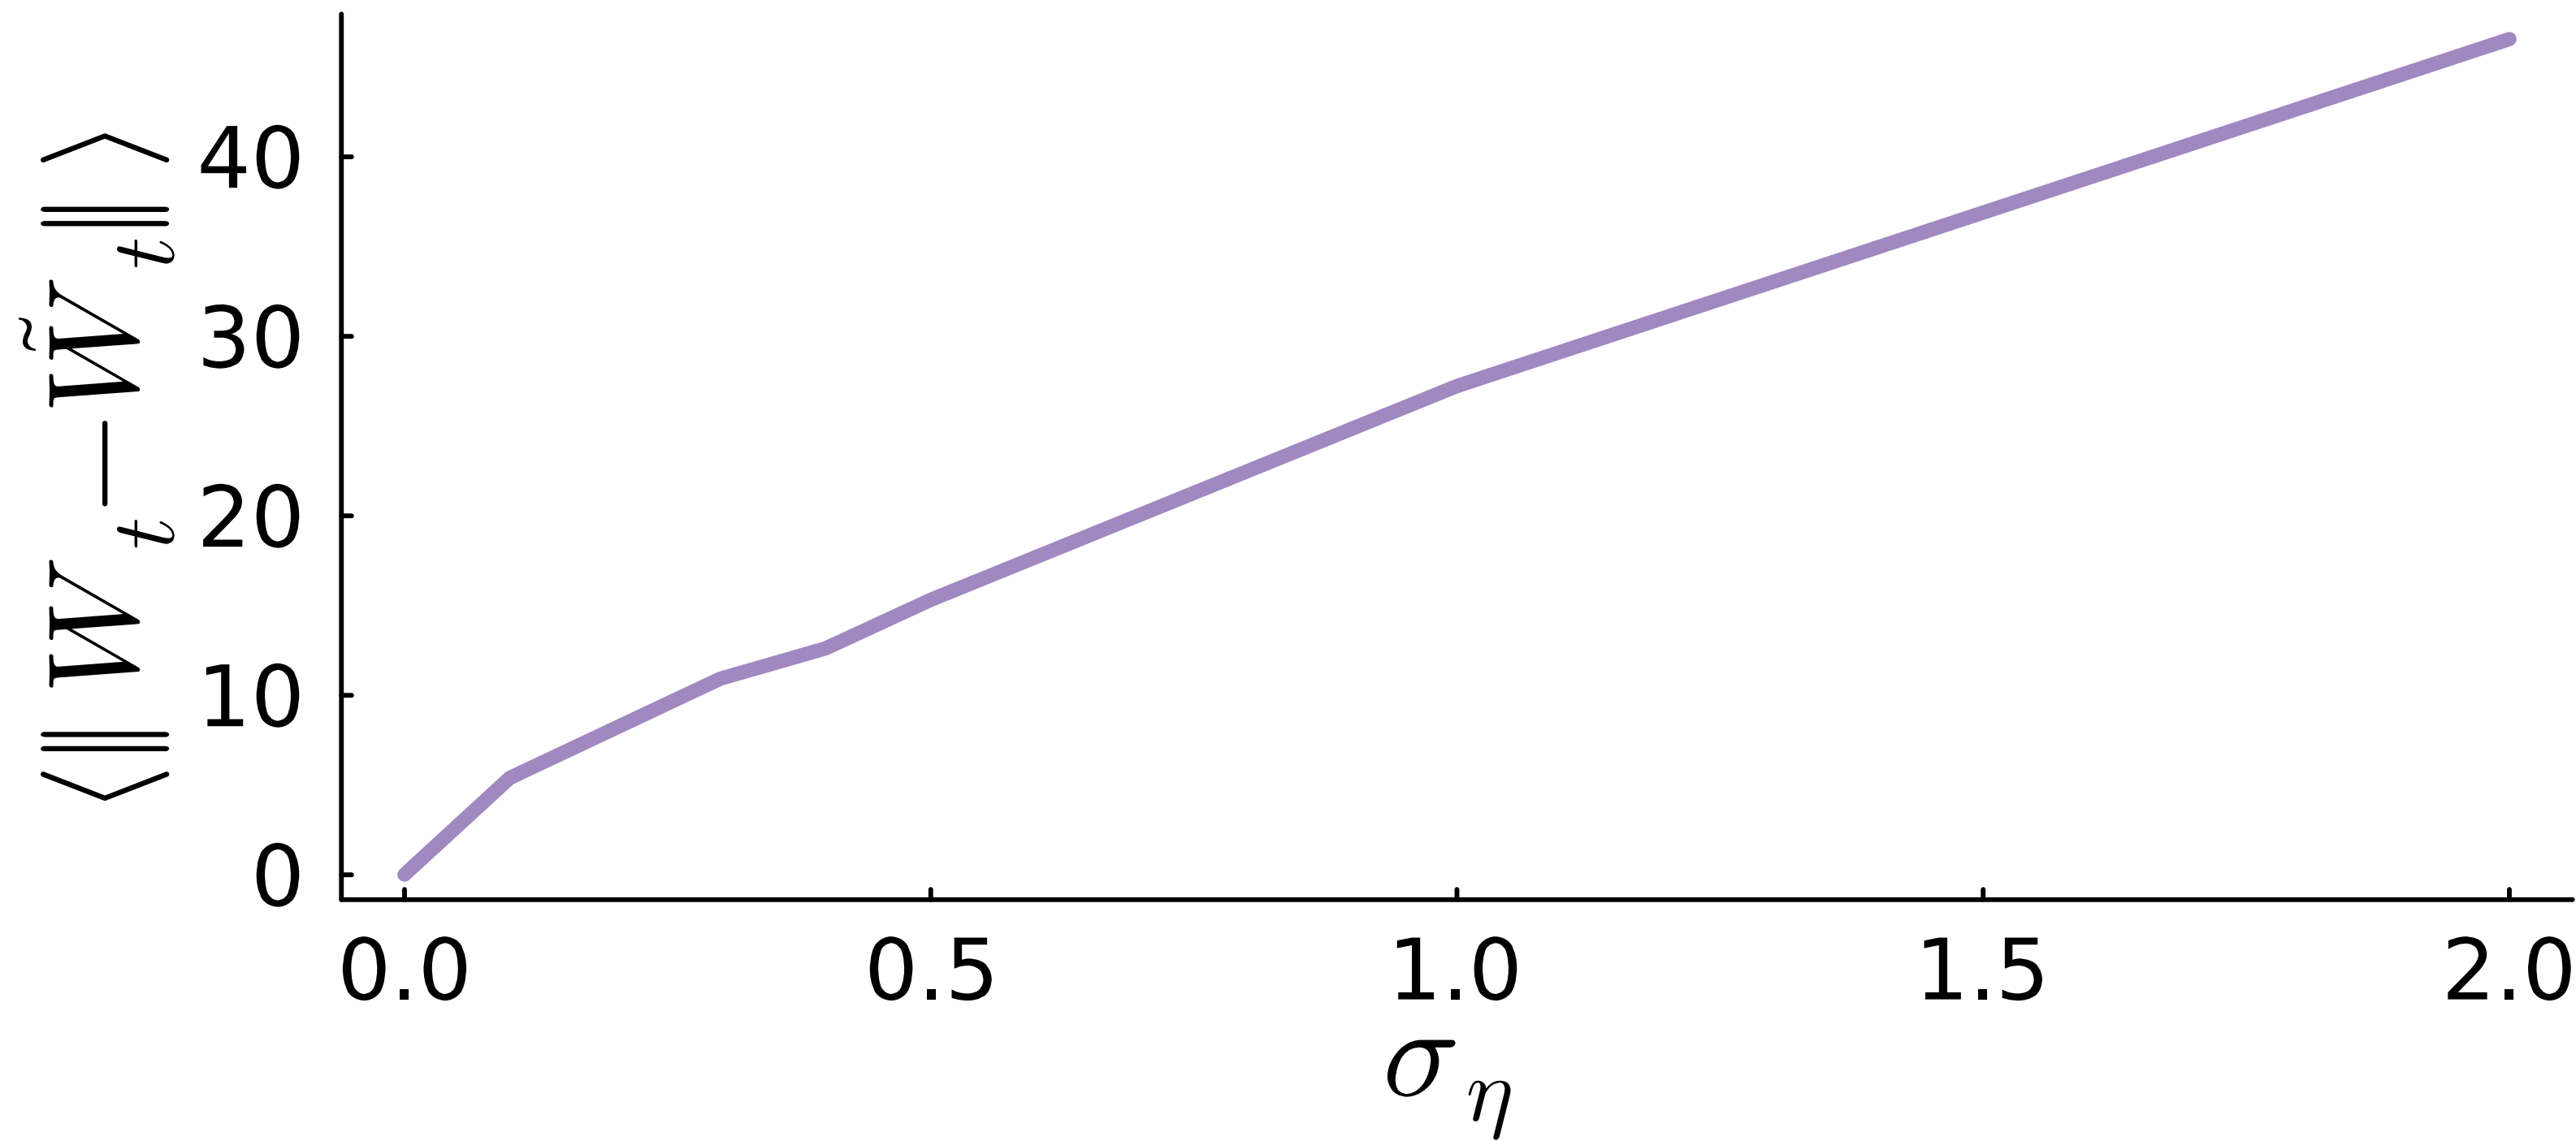

Supplement: supplementary_material [file Model_diff.pdf › Supp_Mat_Submission/Plots/NSC_3D_Reaching_Task/Model_diff.pdf]

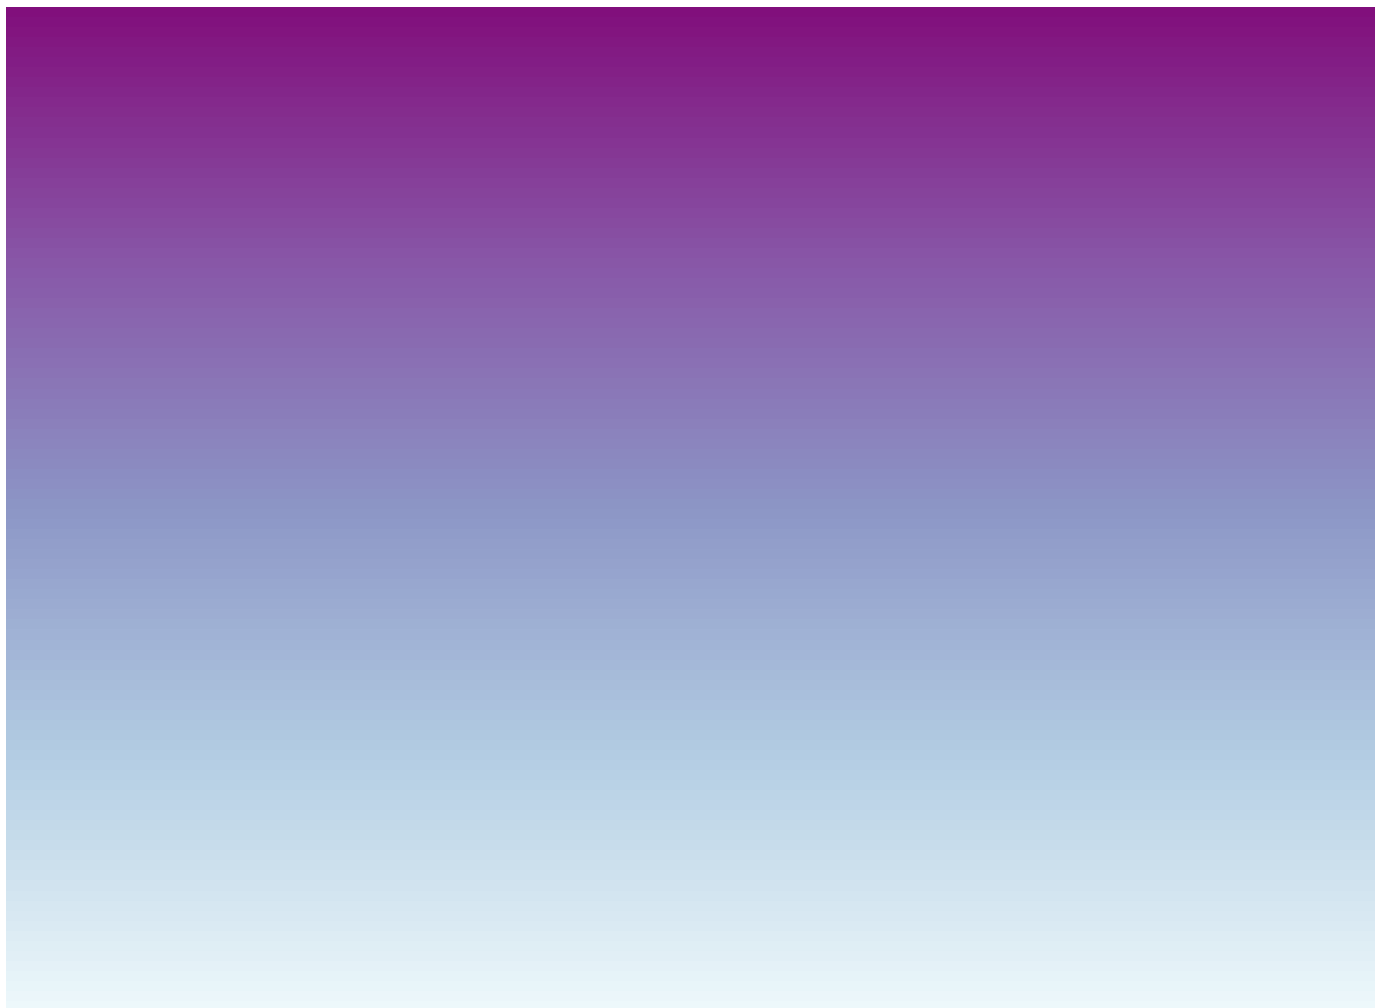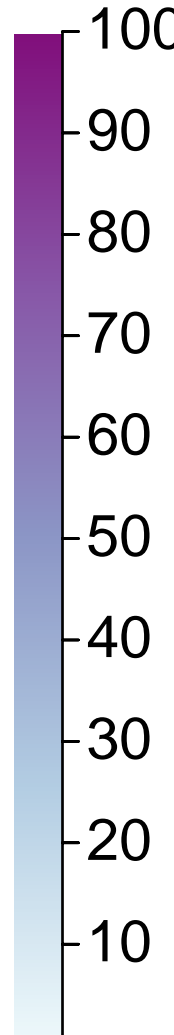

Supplement: supplementary_material [file useful_for_colorbar.pdf › Supp_Mat_Submission/Plots/NSC_3D_Reaching_Task/useful_for_colorbar.pdf]

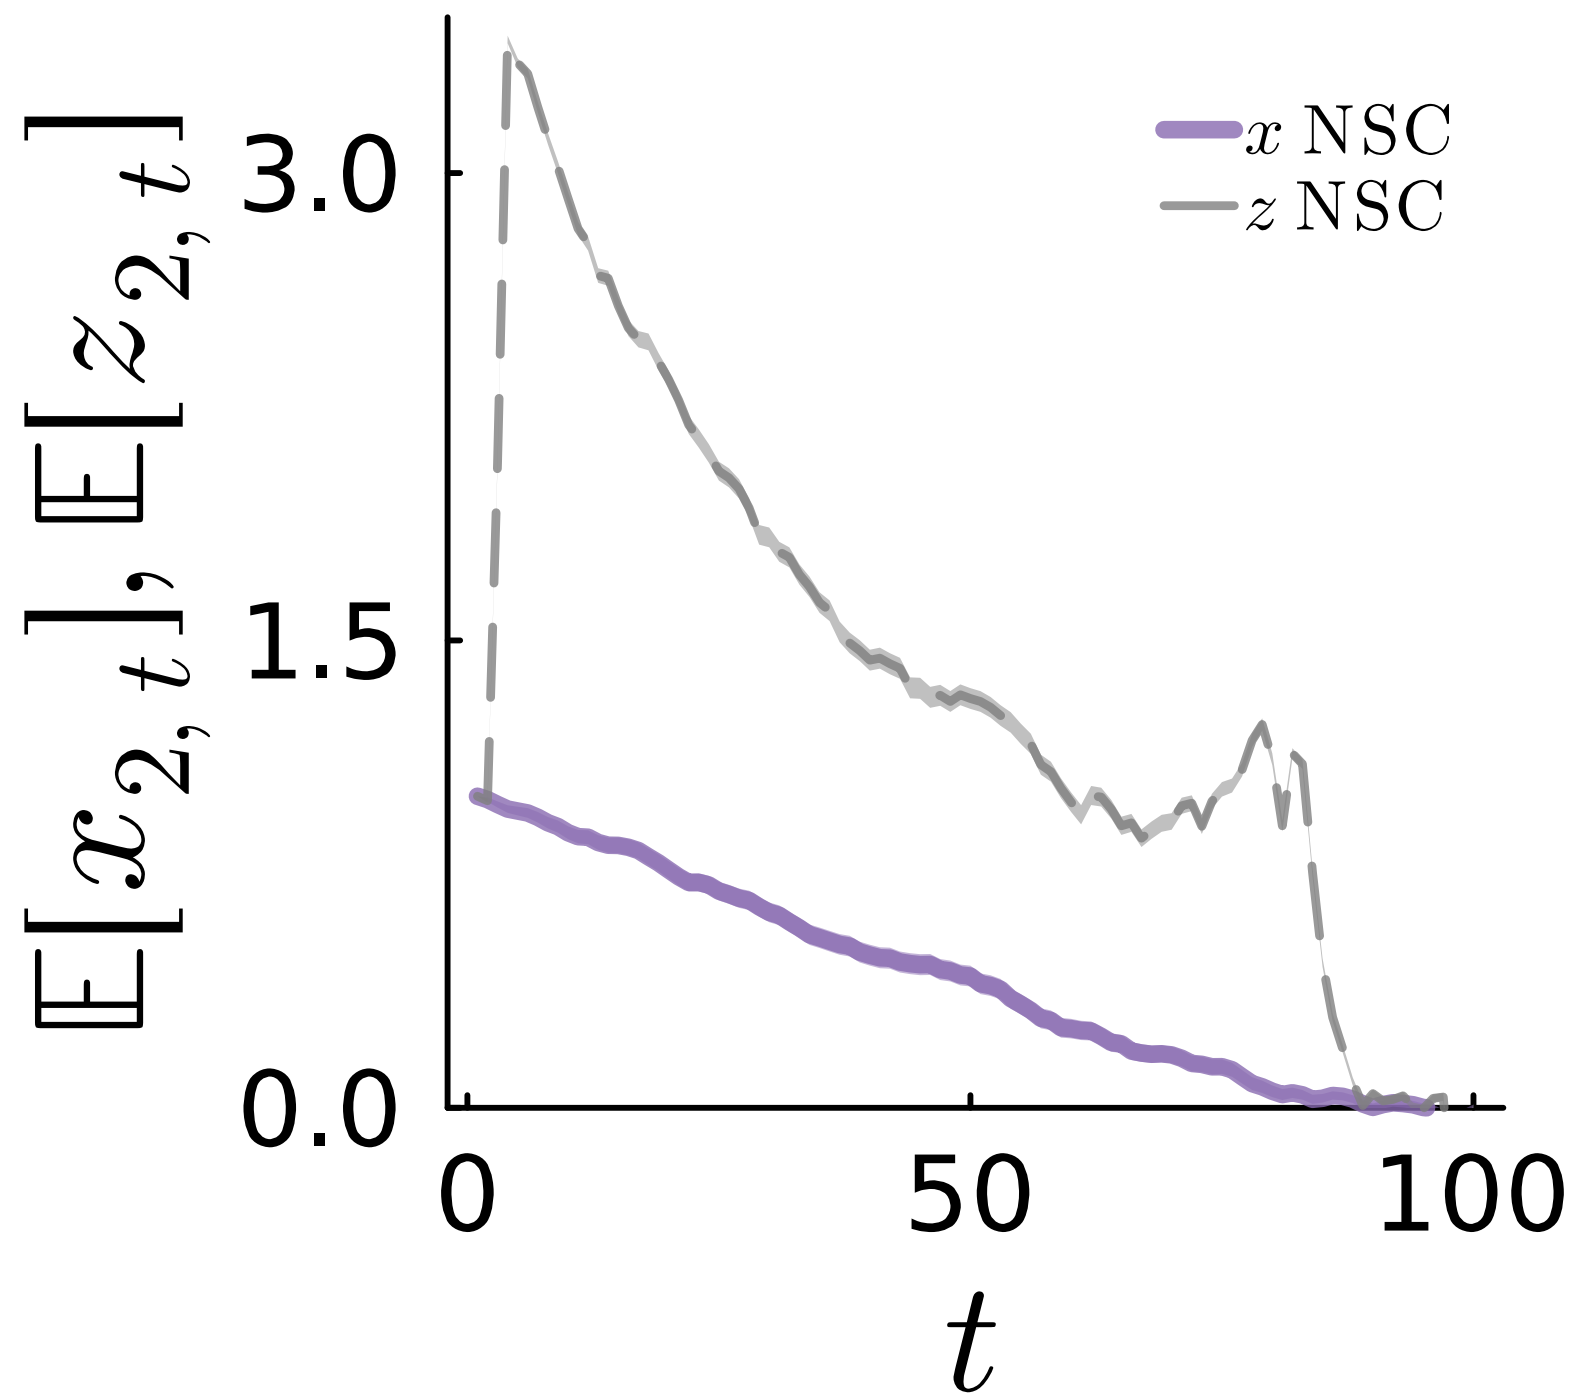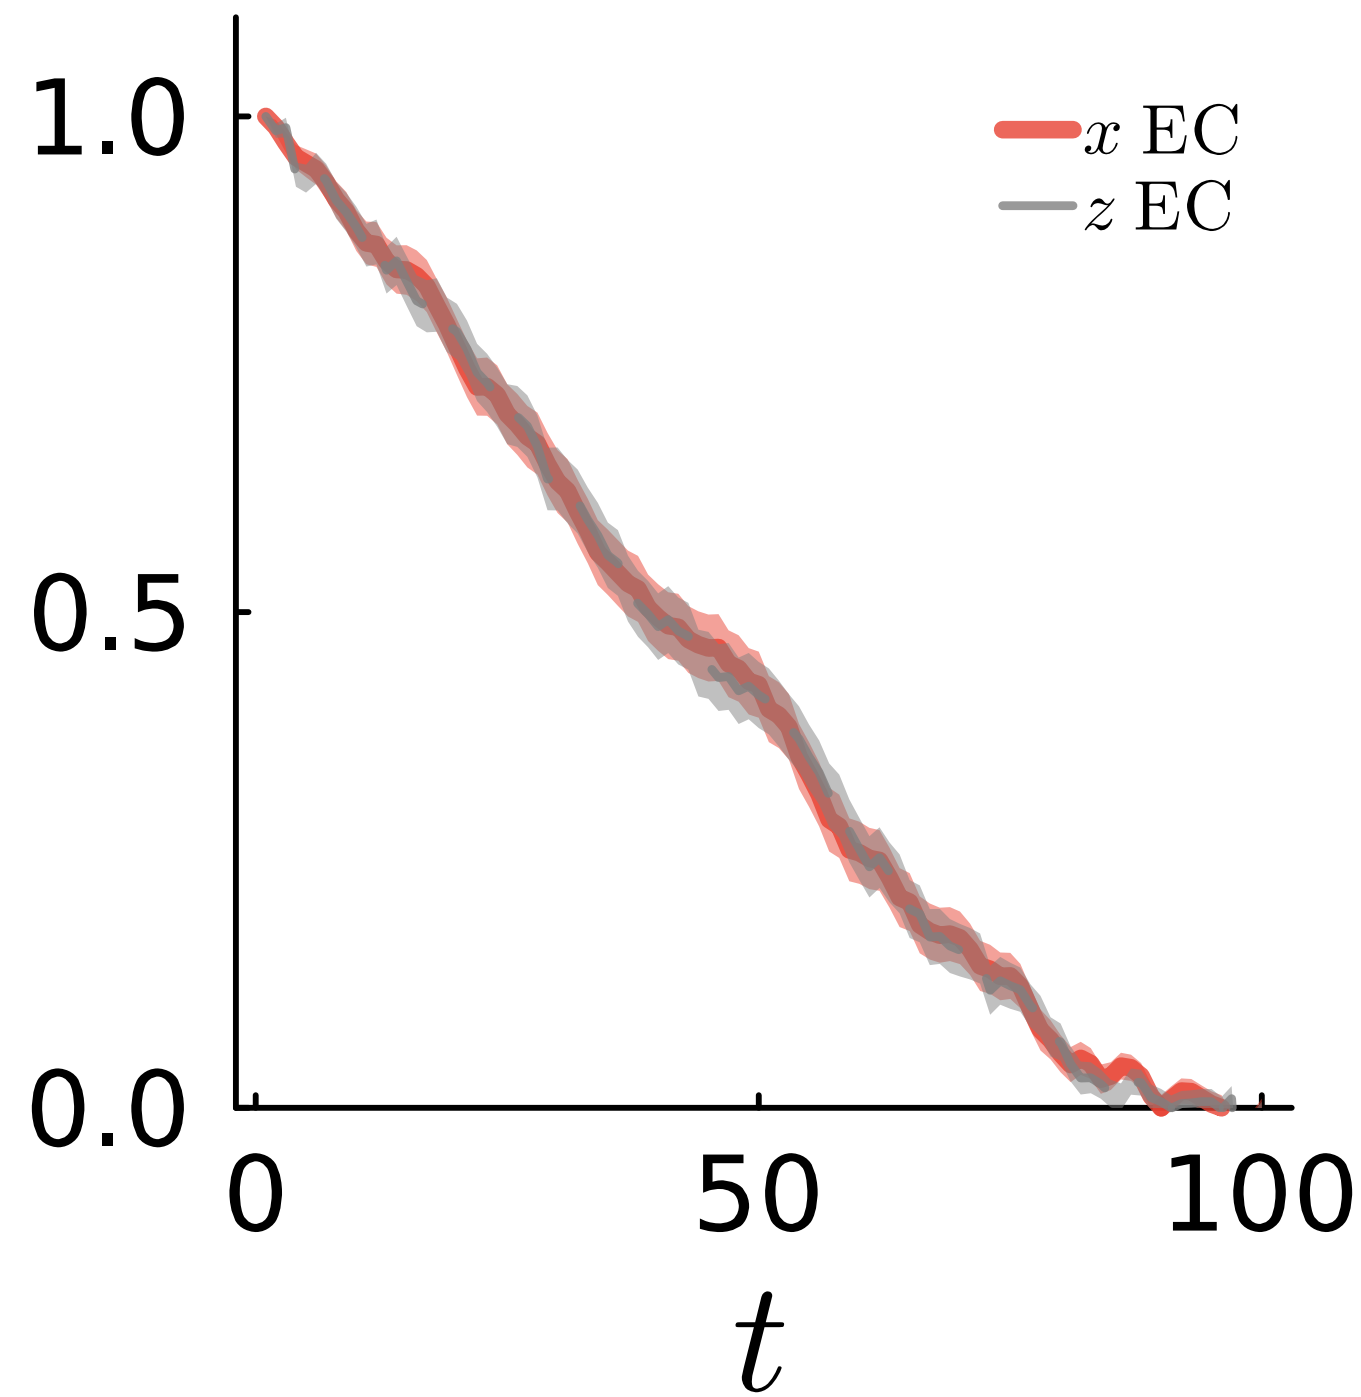

Supplement: supplementary_material [file x_z_comparison.pdf › Supp_Mat_Submission/Plots/NSC_3D_Reaching_Task/x_z_comparison.pdf]

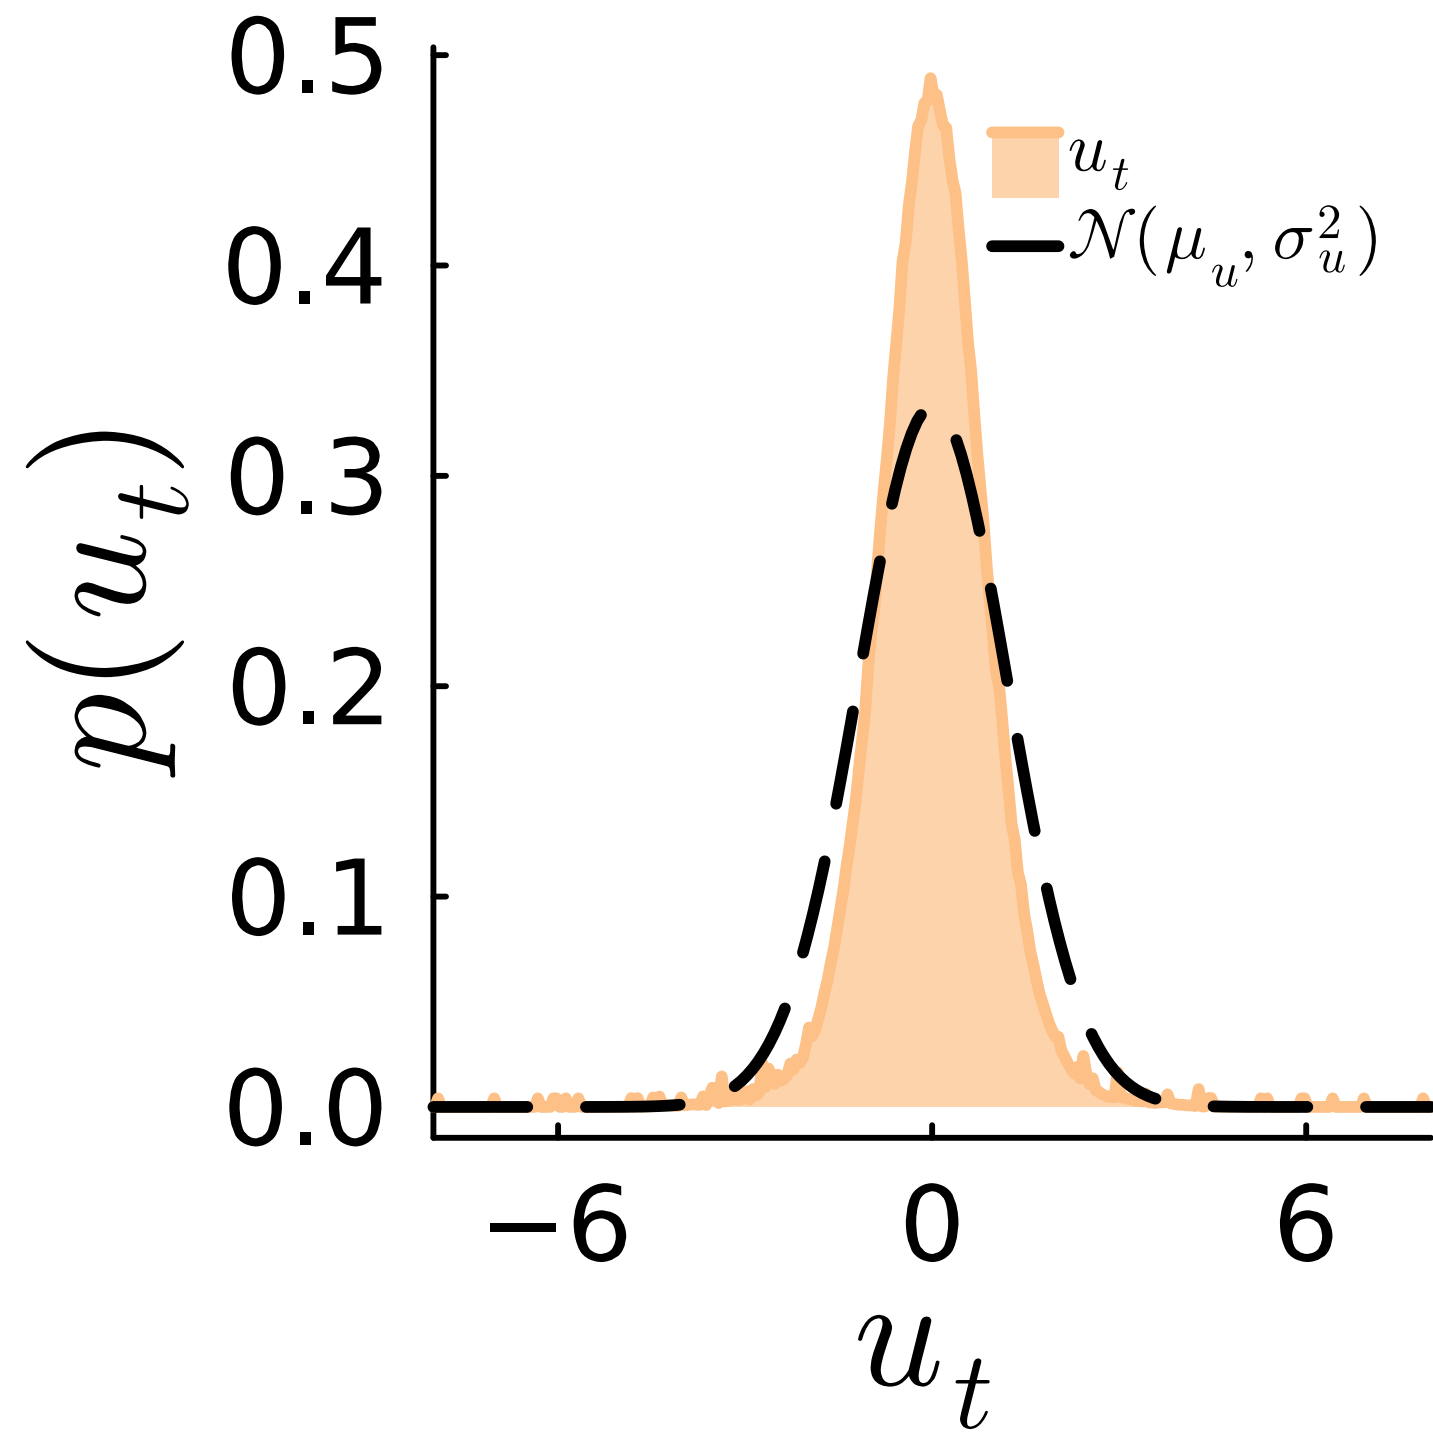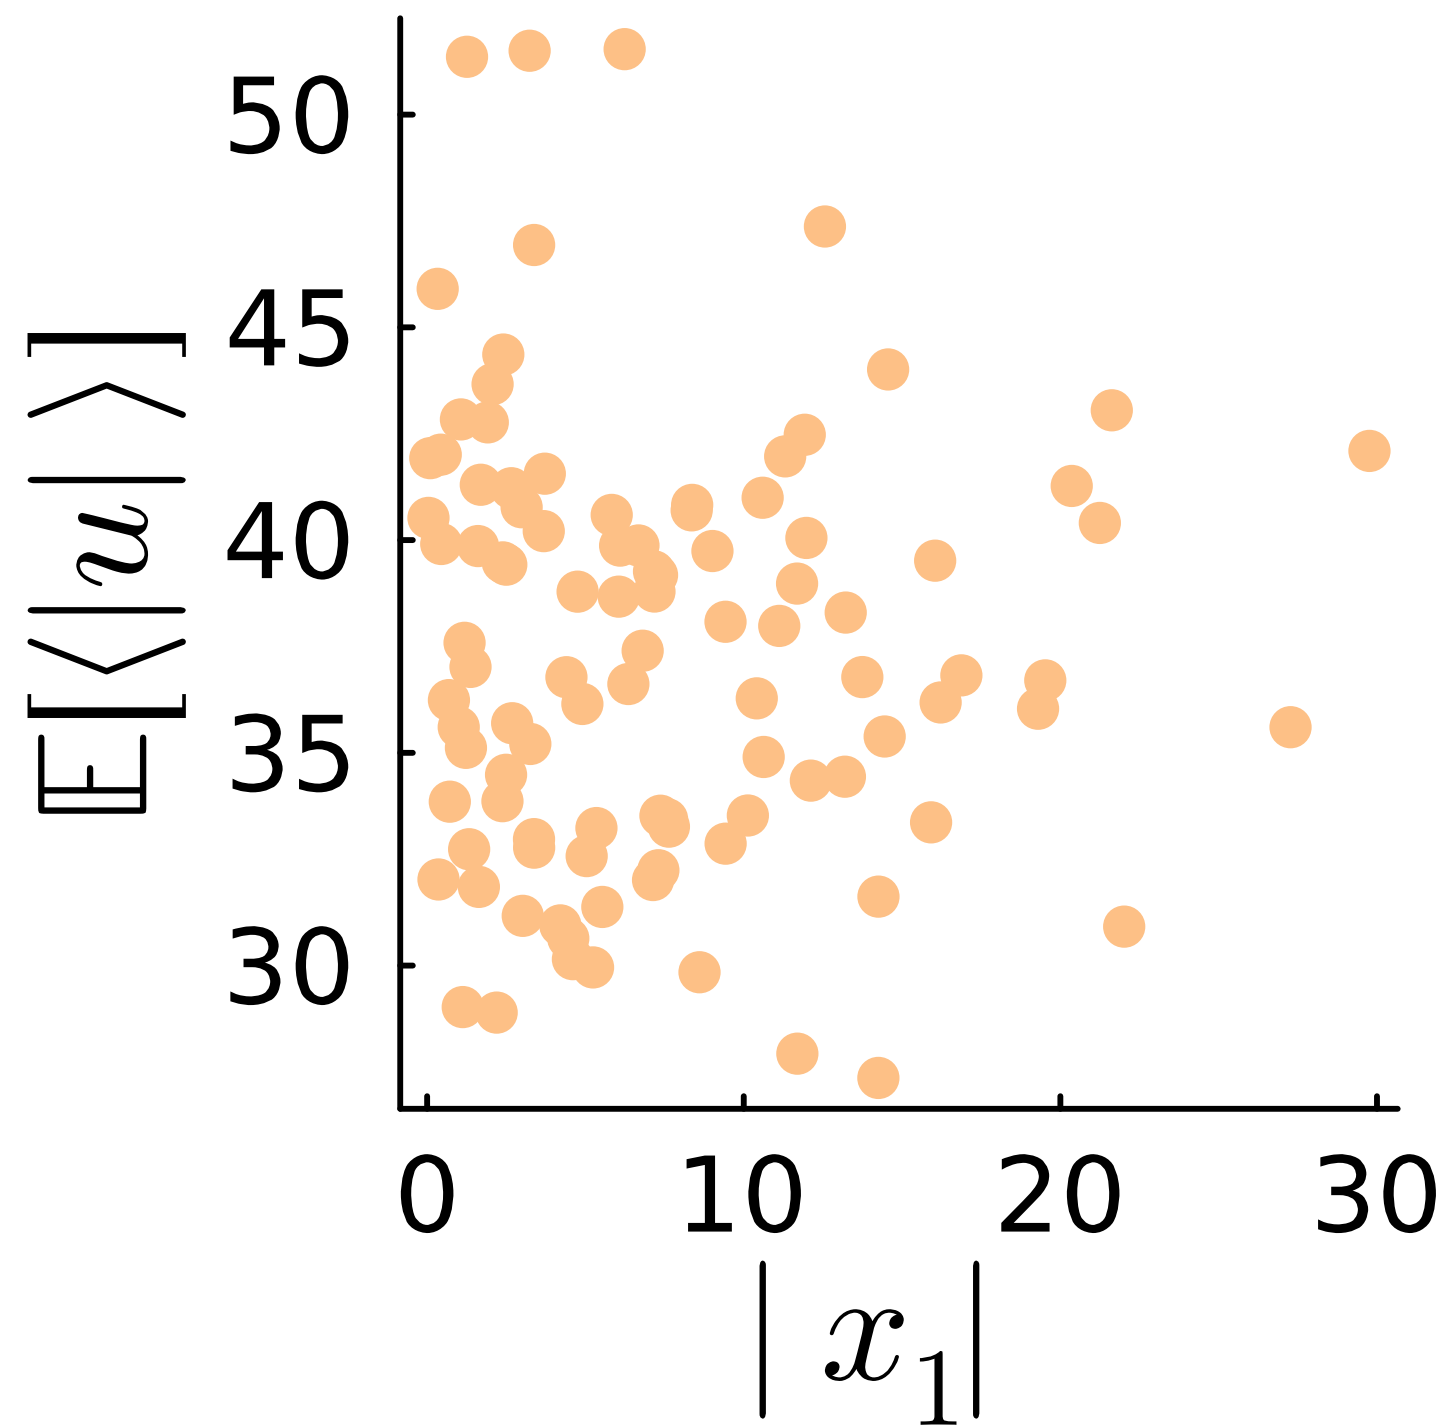

Supplement: supplementary_material [file distr_and_control_sorted.pdf › Supp_Mat_Submission/Plots/NSC_Neural_Populations/distr_and_control_sorted.pdf]

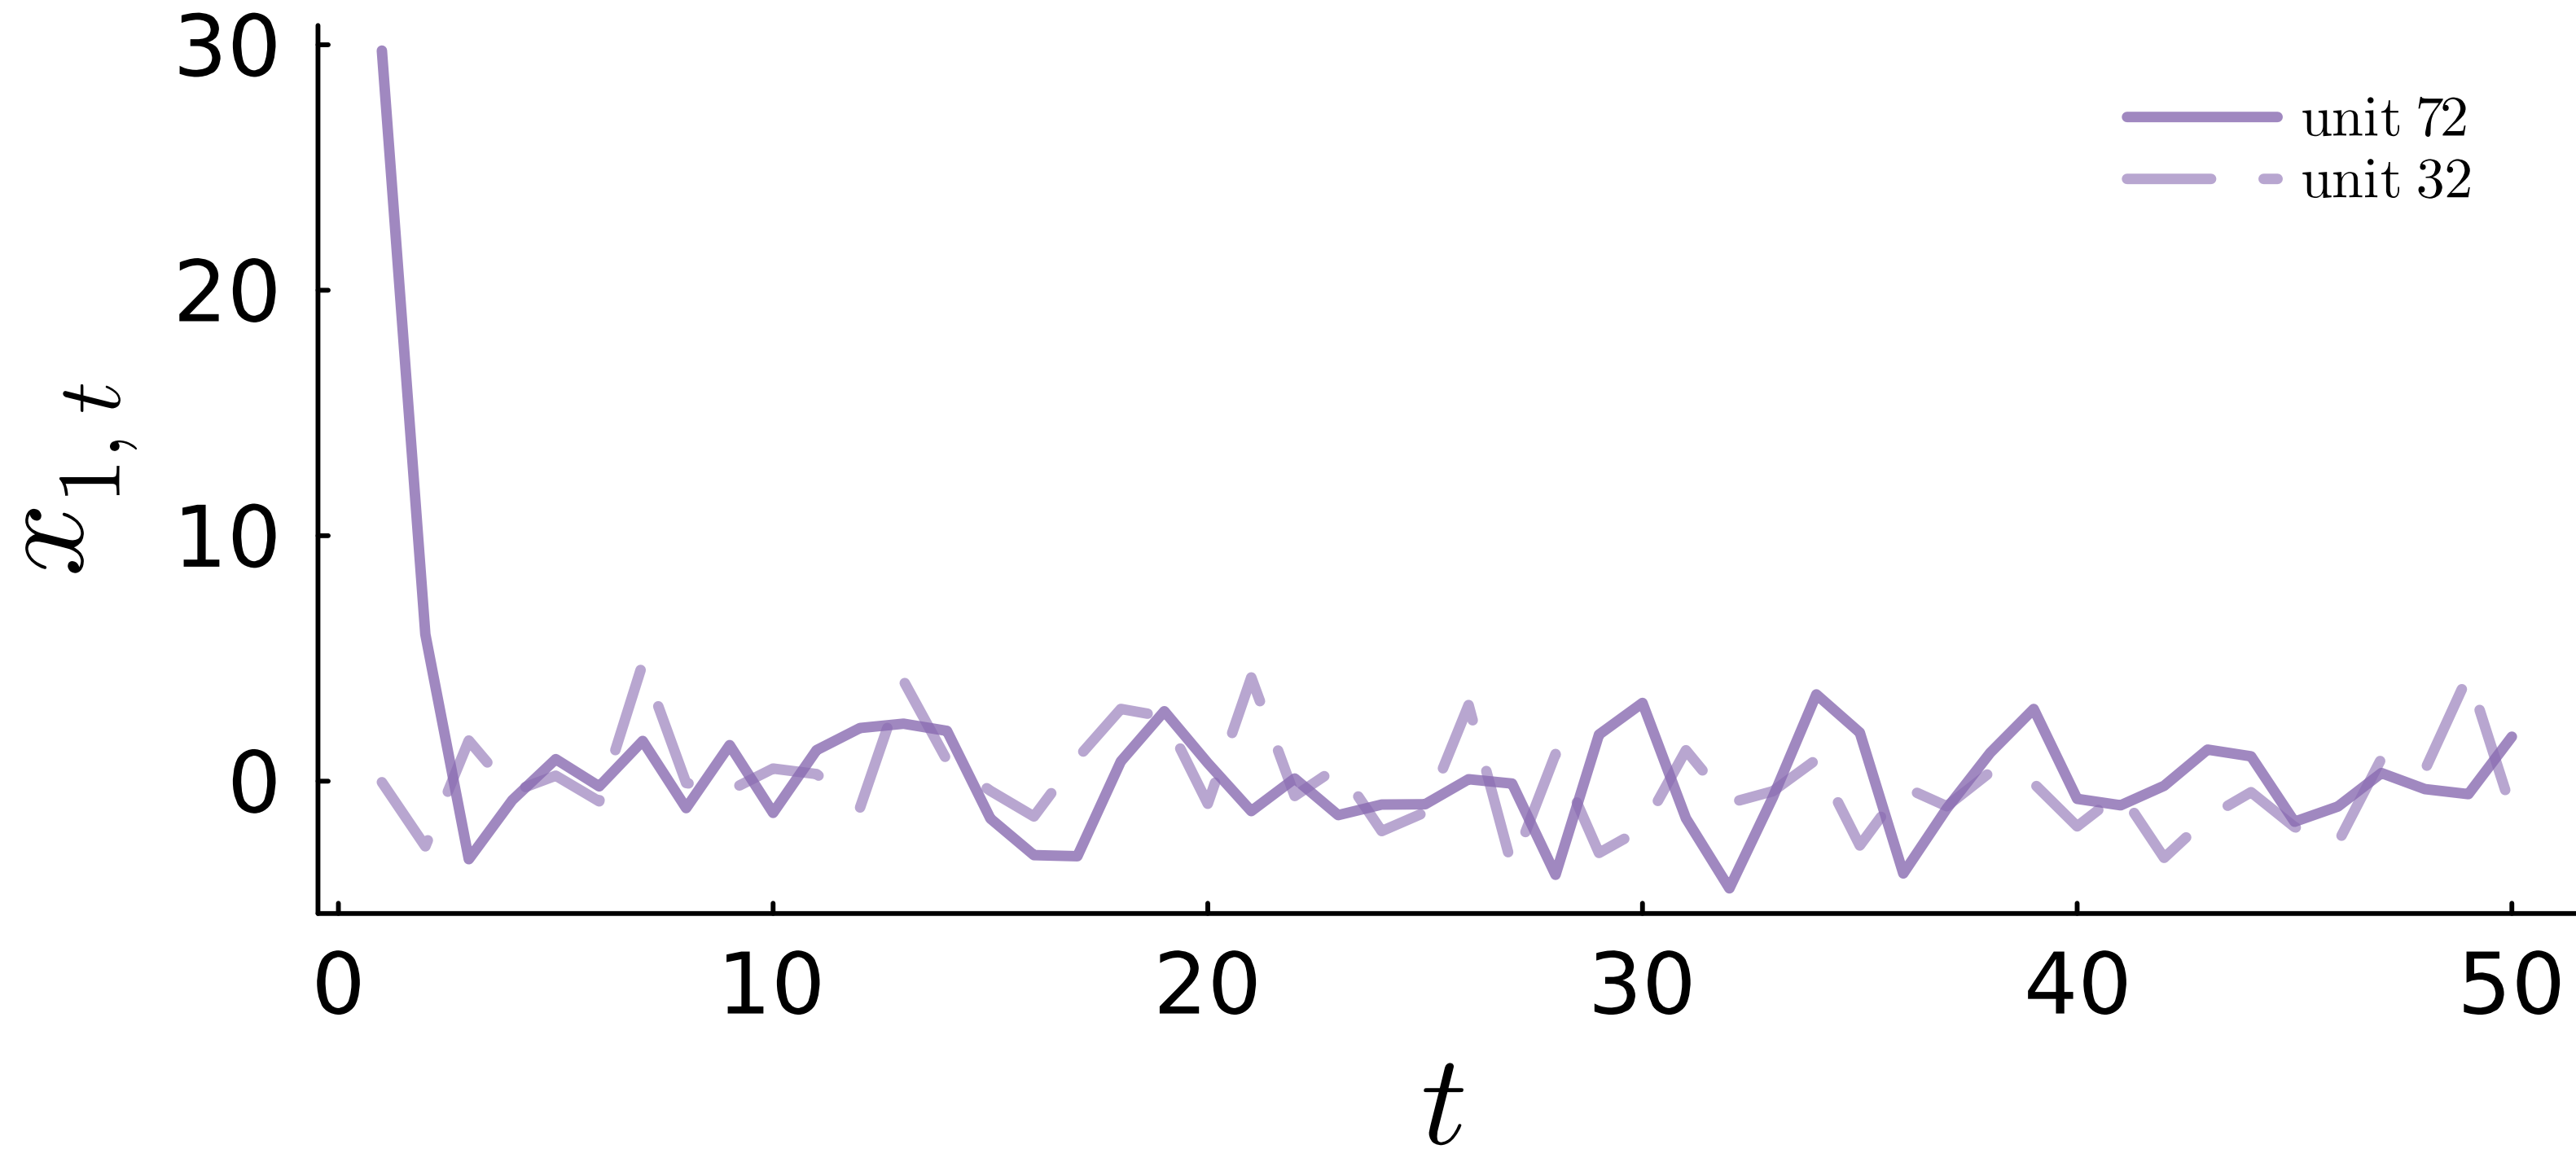

Supplement: supplementary_material [file single_units_x.pdf › Supp_Mat_Submission/Plots/NSC_Neural_Populations/single_units_x.pdf]

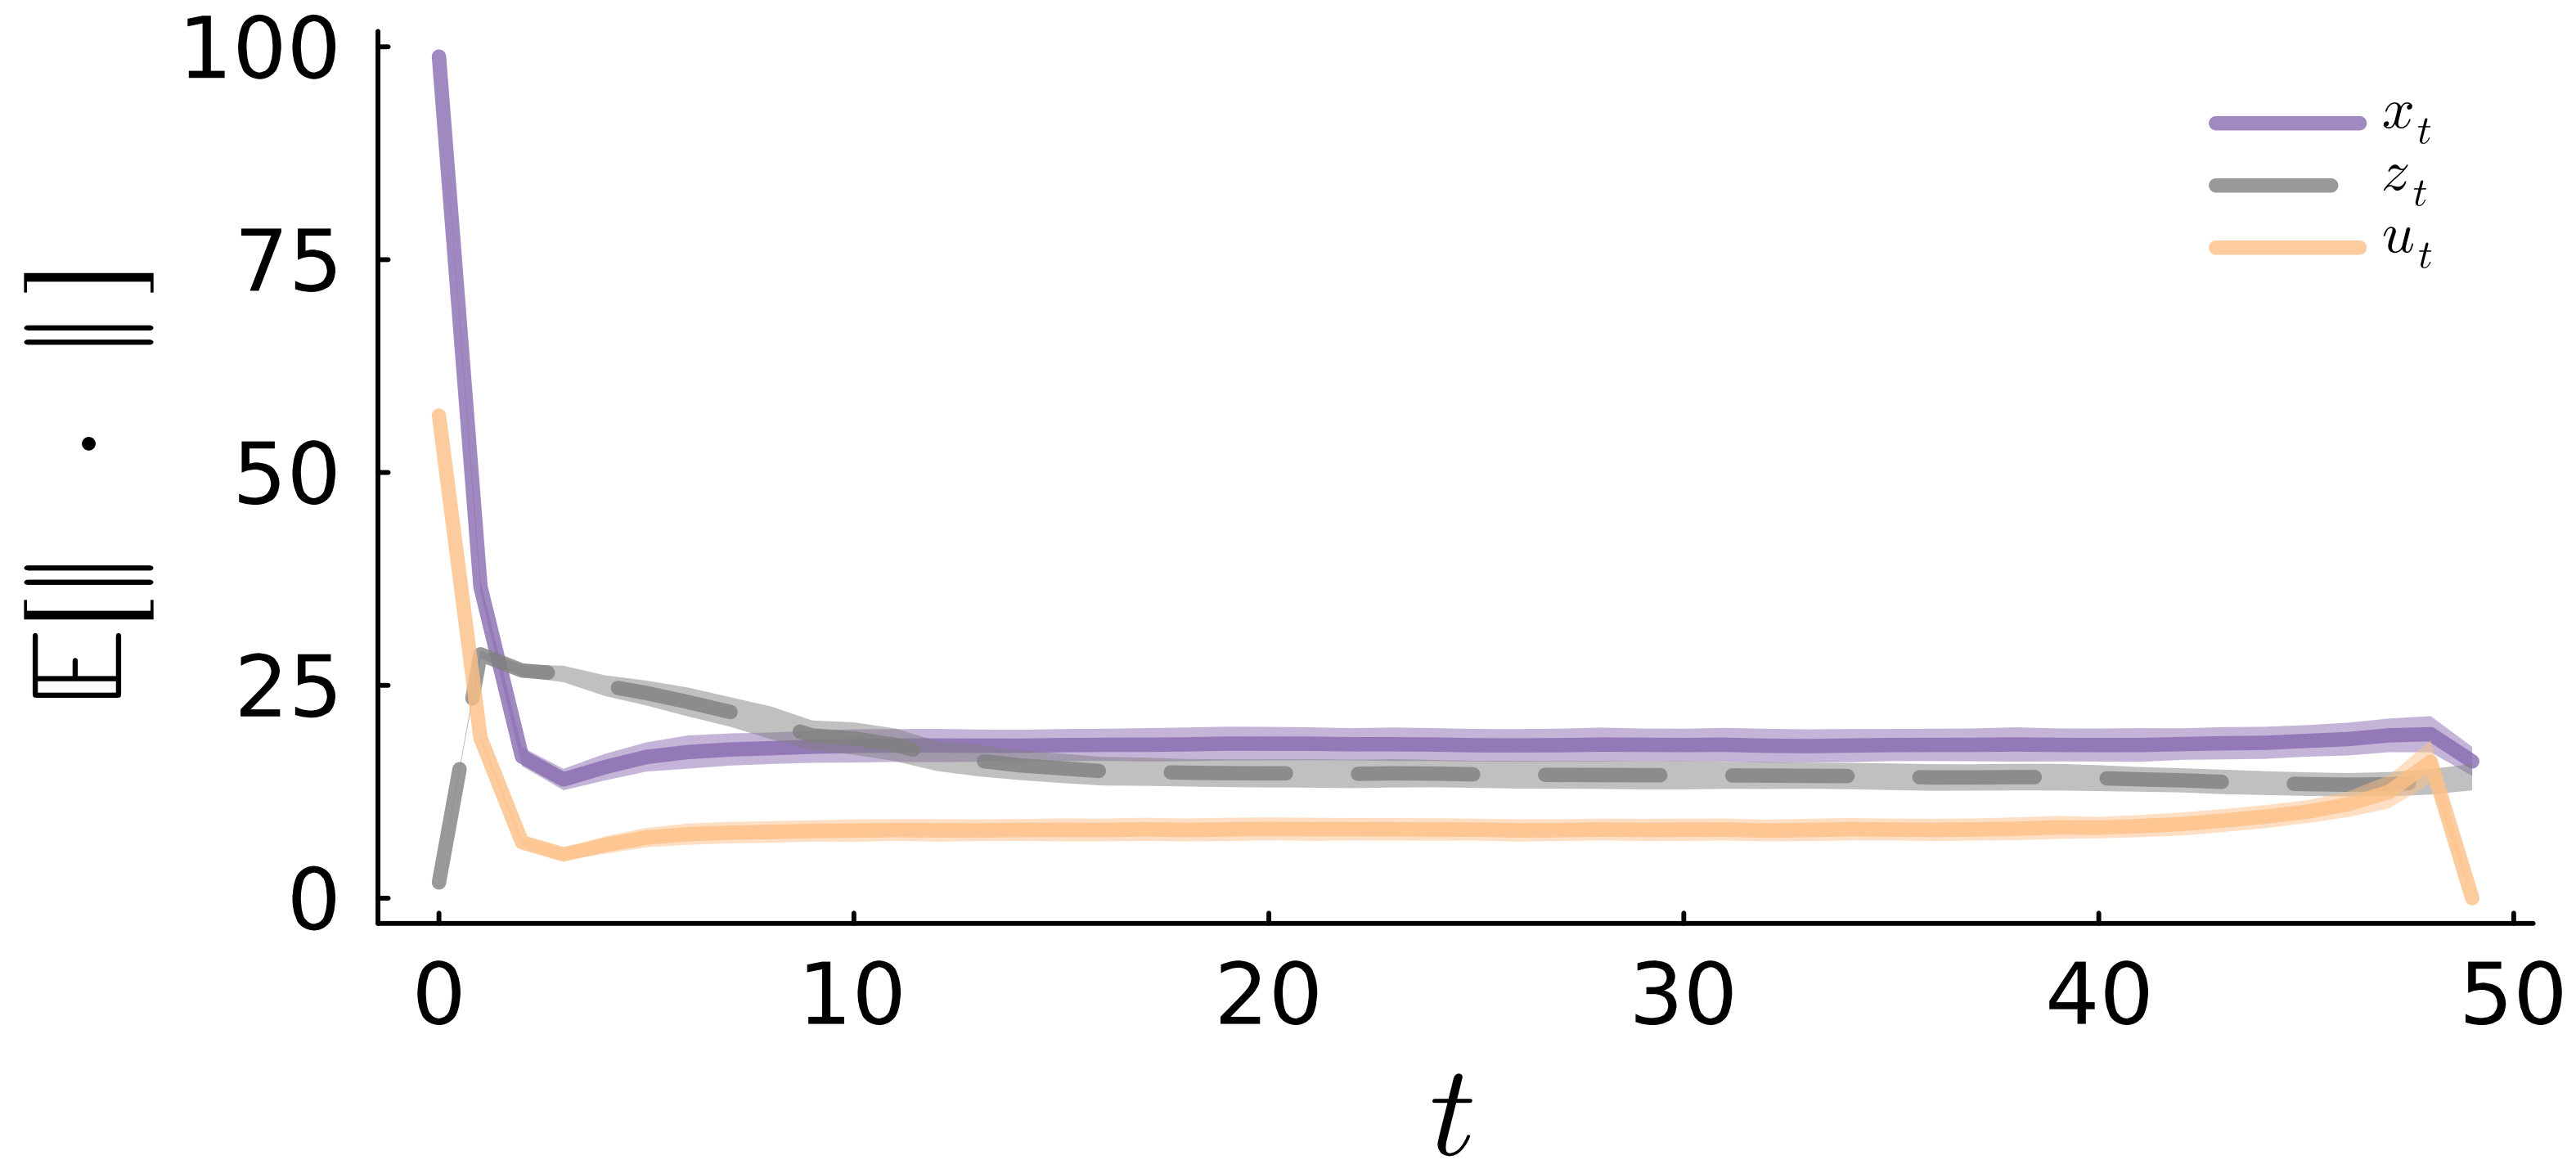

Supplement: supplementary_material [file x_z_u_norms.pdf › Supp_Mat_Submission/Plots/NSC_Neural_Populations/x_z_u_norms.pdf]
